# Supplementary material for: Nuclear proteomic changes linked to soybean rust resistance
Source: Royal Society of Chemistry journal article supplement (doi:10.1039/c0mb00171f), 2010-12-03
Supplement: table_s1-s4.zip [file table_s1-s4.zip]

## Sheet: contsoymerge
Controls
Protein group number	Protein group probability	peptide sequence	number of spectra	distinct or shared (number of shared groups)	missed cleavages	peptide probability	primary modification string (0= no modification; 1=phosphorylatedS; 2=phosphoylatedT; 3=dehydradedS; 4=dehydratedT)	primary neutral loss string (0=no modification; 1=neutral loss was considered at this position; 2=neutral loss was not considered at this position (+80 on S/T)	modification string for paired spectrum (0= no modification; 1=phosphorylatedS; 2=phosphoylatedT; 3=dehydradedS; 4=dehydratedT)	neutral loss string for paired spectrum (0=no modification; 1=neutral loss was considered at this position; 2=neutral loss was not considered at this position (+80 on S/T)	Ions score and Adjusted Ions Score	Identity Score	Observed peptide mass	Computed peptide mass	charge states observed for this peptide	spectrum number	database record	computed protein mass	record header
1	1
		IWDIR	5	shared(14)	0	0.5354
							(00000),				27.58	31.18	701.386	701.386	1	MS2:10__Salt.4343.4343.1.dta
		IFTGGIDNDVK	6	shared(2)	0	0.9922
							(00000000000),				66.32	29.71	1177.6	1177.6	2	MS2:100_acn_grad.2987.2987.2.dta
		MVYIWDTTSR	8	shared(2)	0	0.9909
							(0000000000),				46.4	30.69	1270.6	1270.6	2	MS2:30__Salt.6294.6294.2.dta
							(0000000000),				30.51	30.71	1270.6	1270.6	1	MS2:100_acn_grad.3987.3987.1.dta
		VLEGHQHNFEK	7	shared(2)	0	0.9607
							(00000000000),				48.15	30.66	1336.65	1336.65	2	MS2:100__Salt_Recal.2304.2304.2.dta
		GPPLVVSGSDDGTAK	2	shared(2)	0	0.8885
							(000000000000000),				34.53	30.12	1399.7	1398.7	2	MS2:40__Salt.3149.3149.2.dta
		FNPAGSVVASGSHDR	31	distinct	0	1
							(000000000000000),				111.39	30.45	1499.7	1499.71	2	MS2:60__Salt_Recal.2702.2702.2.dta
							(000000000000000),				30.09	30.51	1499.71	1499.71	3	MS2:60__Salt.3392.3392.3.dta
		EIFLWNVHGDCK	24	shared(2)	0	0.9948
							(000000000000),				71	31.06	1516.71	1516.71	2	MS2:70__Salt.6848.6848.2.dta
		RGPPLVVSGSDDGTAK	22	shared(2)	1	0.9998
							(0000000000000000),				73.2	29.47	1554.8	1554.8	2	MS2:70__Salt.3034.3034.2.dta
							(0000000000000000),				42.33	29	1555.8	1554.8	3	MS2:80__Salt.3140.3140.3.dta
		MVEHLSYVNSCCPSR	34	shared(2)	0	0.9998
							(000000000000000),				87.12	31.06	1837.79	1837.79	2	MS2:70__Salt.3694.3694.2.dta
							(000000000000000),				30.04	30.96	1837.79	1837.79	3	MS2:70__Salt.3856.3856.3.dta
		KMVEHLSYVNSCCPSR	2	shared(2)	1	0.9742
							(0000000000000000),				27.03	31.07	1966.87	1965.89	2	MS2:100__Salt.3505.3505.2.dta
							(0000000000000000),				35.71	31.12	1966.87	1965.89	3	MS2:90__Salt_two.3480.3480.3.dta
		NAVLDLHWTTDGTQIVSASPDK	6	shared(2)	0	0.9969
							(0000000000000000000000),				72.63	30.31	2367.17	2367.17	2	MS2:80__Salt.8203.8203.2.dta
		TSSLESPIMLLSGHQSAIYTMK	56	shared(2)	0	1
							(0000000000000000000000),				53.96	29.71	2393.2	2393.2	3	MS2:70__Salt.9909.9909.3.dta
							(0000000000000000000000),				80.86	29.75	2393.19	2393.2	2	MS2:80__Salt.9776.9776.2.dta
		GSIQTFPDKYQITAVGFSDASDK	13	shared(2)	1	0.9997
							(00000000000000000000000),				62.25	31.02	2474.2	2474.2	3	MS2:80__Salt.7740.7740.3.dta
							(00000000000000000000000),				47.61	31.13	2474.19	2474.2	2	MS2:80__Salt.7549.7549.2.dta
																	Glyma19g29230.1	38684.9	WD40 REPEAT PROTEIN
2	1
		YHTEFK	1	shared(2)	0	0.7334
							(000000),				27.77	29.68	823.388	823.386	1	MS2:80__Salt.2486.2486.1.dta
		RIENLGR	5	shared(2)	1	0.9875
							(0000000),				48.23	27.26	856.488	856.488	2	MS2:90__Salt_one.2346.2346.2.dta
							(0000000),				27.04	27.26	856.489	856.488	1	MS2:90__Salt_two.2493.2493.1.dta
		KYEQVLSR	1	shared(3)	1	0.9315
							(00000000),				42.48	28.24	1021.55	1021.56	2	MS2:90__Salt_one.2622.2622.2.dta
		RFDEVQER	1	shared(2)	1	0.9691
							(00000000),				51.85	29.46	1077.52	1077.52	2	MS2:50__Salt.2471.2471.2.dta
		EAIVFQQEK	1	shared(2)	0	0.7085
							(000000000),				25.9	29.7	1090.57	1090.57	2	MS2:100_acn_grad.968.968.2.dta
		RYEDAINDK	2	shared(4)	1	0.9135
							(000000000),				39.77	29.77	1122.53	1122.53	2	MS2:40__Salt.2326.2326.2.dta
		SFILNQLLGK	4	shared(2)	0	0.903
							(0000000000),				36.75	24.15	1131.66	1131.66	2	MS2:20__Salt.8870.8870.2.dta
		DLEALLDKDK	3	shared(2)	1	0.9756
							(0000000000),				53.86	30.06	1158.61	1158.61	2	MS2:100_acn_grad.3478.3478.2.dta
		LIATIESEKR	4	distinct	1	0.9713
							(0000000000),				51.6	28.23	1158.66	1158.66	2	MS2:40__Salt.2960.2960.2.dta
		GLWLWSAPLK	2	shared(3)	0	0.886
							(0000000000),				35.84	28.14	1170.66	1169.66	2	MS2:30__Salt.9361.9361.2.dta
		IDSLHQELTK	11	shared(4)	0	0.9996
							(0000000000),				65.57	27.9	1182.62	1182.62	2	MS2:50__Salt.3230.3230.2.dta
							(0000000000),				48.86	28.35	1182.63	1182.62	1	MS2:60__Salt.3238.3238.1.dta
		LDQISMDKLR	4	shared(2)	1	0.9818
							(0000000000),				31.77	29.09	1217.64	1217.64	3	MS2:30__Salt.3919.3919.3.dta
							(0000000000),				38.88	29.24	1217.64	1217.64	2	MS2:80__Salt.4299.4299.2.dta
		SIEEKVDLLTK	1	shared(2)	1	0.9376
							(00000000000),				42.21	27.72	1273.71	1273.71	2	MS2:80__Salt.5003.5003.2.dta
		VLDALLSEYEK	3	shared(2)	0	0.9753
							(00000000000),				53.37	30.31	1278.67	1278.67	2	MS2:100_acn_grad_Recal.4184.4184.2.dta
		FRLNETALDSK	1	shared(2)	1	0.9733
							(00000000000),				52.51	30.31	1292.67	1292.67	2	MS2:80__Salt.4583.4583.2.dta
		TGFREGLDSLTK	1	distinct	1	0.9539
							(000000000000),				48.26	30.49	1322.68	1322.68	3	MS2:70__Salt.5075.5075.3.dta
		DFYLDLTEDNR	1	shared(2)	0	0.9916
							(00000000000),				65.79	30.61	1399.62	1399.63	2	MS2:100_acn_grad.4224.4224.2.dta
		DFYLDLTEDNRK	5	shared(2)	1	0.9642
							(000000000000),				48.91	31.01	1527.72	1527.72	2	MS2:100_acn_grad.3579.3579.2.dta
		VDDNIGDDMDVSPR	1	shared(2)	0	0.9506
							(00000000000000),				44.35	30.74	1547.66	1546.66	2	MS2:30__Salt.4202.4202.2.dta
		NSAQILEQLLETER	2	shared(2)	0	0.9968
							(00000000000000),				75.28	29.33	1643.84	1642.85	2	MS2:100_acn_grad.6845.6845.2.dta
		DYLEIALRPVQGSGK	8	shared(2)	0	0.9827
							(000000000000000),				55.16	27.5	1644.89	1644.88	2	MS2:80__Salt.7501.7501.2.dta
		QKAEEDQASSEIAALK	1	shared(2)	1	0.9946
							(0000000000000000),				68.63	30.33	1716.85	1716.85	2	MS2:50__Salt.4174.4174.2.dta
		FRMDPEAVATLQLVK	3	shared(2)	1	0.9983
							(000000000000000),				37.04	27.14	1716.92	1716.92	2	MS2:90__Salt_one.9106.9106.2.dta
							(000000000000000),				55.58	27.19	1716.92	1716.92	3	MS2:90__Salt_one.9112.9112.3.dta
		EQAQSAQEEAEEWKR	1	shared(2)	1	0.9963
							(000000000000000),				73.79	31.49	1817.82	1817.82	2	MS2:40__Salt.3306.3306.2.dta
		MRVDDNIGDDMDVSPR	5	shared(2)	1	0.9999
							(0000000000000000),				82.11	31.2	1833.8	1833.8	2	MS2:40__Salt.4961.4961.2.dta
							(0000000000000000),				40.87	31.02	1834.8	1833.8	3	MS2:40__Salt.4945.4945.3.dta
		LAVFLQQSFEGPVLDLVK	9	shared(2)	0	0.9996
							(000000000000000000),				97.18	23.07	2002.12	2002.11	2	MS2:10__Salt.12385.12385.2.dta
		TSASELGQFSPIFVWLLR	18	shared(2)	0	0.9999
							(000000000000000000),				77.94	26.77	2050.09	2050.09	2	MS2:100_acn_grad.10262.10262.2.dta
							(000000000000000000),				50.16	26.77	2050.09	2050.09	3	MS2:50__Salt.14089.14089.3.dta
		ECFTLVRPLNNENDLQR	1	shared(2)	0	0.8127
							(00000000000000000),				32.26	30.85	2118.03	2117.03	3	MS2:60__Salt_Recal.5339.5339.3.dta
		QVGATMMTGPVLVGITESYLK	1	shared(2)	0	0.9641
							(000000000000000000000),				44.58	28.24	2195.14	2194.14	2	MS2:100_acn_grad.7060.7060.2.dta
		NSAQILEQLLETEREAHAQANNR	1	shared(2)	1	0.8459
							(00000000000000000000000),				29.79	29.38	2635.31	2634.31	3	MS2:100__Salt.8949.8949.3.dta
		ALNEGAVPTISSSWQSVEEAECHR	6	shared(2)	0	0.9991
							(000000000000000000000000),				58.11	31.58	2656.22	2656.22	3	MS2:40__Salt.8350.8350.3.dta
							(000000000000000000000000),				36.85	31.79	2657.22	2656.22	2	MS2:40__Salt.8363.8363.2.dta
		DSPAADASPPSPAAATPSYSSSSASPVTGPARPIR	1	distinct	0	0.9813
							(00000000000000000000000000000000000),				49.25	30.44	3323.6	3322.61	3	MS2:90__Salt_two_Recal.4452.4452.3.dta
																	Glyma13g24260.1	120853	GUANYLATE-BINDING PROTEIN
3	1
		RSSVAAIER	1	shared(2)	1	0.8552
							(000000000),				34.07	30.54	987.545	987.546	2	MS2:90__Salt_two.2267.2267.2.dta
		EYHWDVR	1	shared(2)	0	0.7284
							(0000000),				28.72	29.65	1003.45	1003.45	2	MS2:60__Salt.3626.3626.2.dta
		FRNELPDPSAQPK	7	shared(2)	1	0.9418
							(0000000000000),				42.68	29.79	1497.76	1497.76	2	MS2:80__Salt.3614.3614.2.dta
		VGLEMDDGLEDQHR	6	distinct	0	0.9999
							(00000000000000),				93.42	30.87	1612.72	1612.71	2	MS2:50__Salt.4690.4690.2.dta
							(00000000000000),				31.81	30.67	1613.72	1612.71	3	MS2:50__Salt.4682.4682.3.dta
		RVGLEMDDGLEDQHR	2	distinct	1	0.9983
							(000000000000000),				39.68	31.32	1768.82	1768.82	3	MS2:80__Salt.4046.4046.3.dta
							(000000000000000),				55.01	31.41	1768.82	1768.82	2	MS2:80__Salt.4072.4072.2.dta
		DIYDENEDVSYSWIR	6	shared(2)	0	0.9995
							(000000000000000),				95.33	30.9	1902.83	1902.83	2	MS2:100_acn_grad.4824.4824.2.dta
		DLYPVEVMPLLPDFDR	1	shared(2)	0	0.9366
							(0000000000000000),				40.6	30.31	1918.96	1917.95	2	MS2:100_acn_grad.7431.7431.2.dta
		GDDADDPTTFLVAFDESEAR	3	distinct	0	0.9999
							(00000000000000000000),				86.4	30.96	2169.93	2169.93	2	MS2:100_acn_grad.6151.6151.2.dta
							(00000000000000000000),				34.06	30.97	2169.93	2169.93	3	MS2:100_acn_grad.6191.6191.3.dta
		LFVEPDLGIPLDLLDLSVYNPPR	4	distinct	0	0.9999
							(00000000000000000000000),				31.5	24.44	2594.41	2594.4	3	MS2:100_acn_grad.9637.9637.3.dta
							(00000000000000000000000),				92.77	23.86	2595.41	2594.4	2	MS2:10__Salt.15683.15683.2.dta
																	Glyma08g21490.1	73704.9	FAMILY NOT NAMED
4	1
		LPLKDR	2	distinct	1	0.6016
							(000000),				21.47	22.28	740.454	740.454	1	MS2:70__Salt.2254.2254.1.dta
		EIVGVKK	1	shared(2)	1	0.6134
							(0000000),				23.04	27.76	771.486	771.485	1	MS2:50__Salt.1976.1976.1.dta
		DLKLPLK	5	distinct	1	0.9687
							(0000000),				34.87	23.07	826.536	825.532	2	MS2:40__Salt.4320.4320.2.dta
							(0000000),				33.22	20.53	825.533	825.532	1	MS2:50__Salt.4508.4508.1.dta
		LRAEYLR	2	shared(2)	1	0.8257
							(0000000),				31.95	27.01	919.528	919.524	2	MS2:80__Salt_Recal.2398.2398.2.dta
		AWPYVQNDLR	1	shared(2)	0	0.7872
							(0000000000),				29.26	30.47	1260.63	1260.62	2	MS2:10__Salt.5481.5481.2.dta
		FDLNTVIAAKPK	52	distinct	0	1
							(000000000000),				90.83	27.23	1315.74	1315.75	2	MS2:70__Salt_Recal.5491.5491.2.dta
							(000000000000),				50.39	26.31	1315.75	1315.75	3	MS2:60__Salt.6503.6503.3.dta
		KAWPYVQNDLR	8	shared(2)	1	0.9936
							(00000000000),				42.69	29.89	1388.72	1388.72	2	MS2:90__Salt_one.4820.4820.2.dta
							(00000000000),				39.41	30.12	1388.72	1388.72	3	MS2:90__Salt_one.4823.4823.3.dta
		LFQDISNLDHAAK	112	shared(2)	0	1
							(0000000000000),				62.17	29.75	1470.75	1470.75	3	MS2:60__Salt.5766.5766.3.dta
							(0000000000000),				76.36	29.92	1470.75	1470.75	2	MS2:80__Salt.5652.5652.2.dta
		FFLQPLSPTDAAQR	59	distinct	0	0.9949
							(00000000000000),				69.96	29.56	1589.82	1589.82	2	MS2:20__Salt.6886.6886.2.dta
		YYAATVSSLNDVLAK	2	shared(2)	0	0.9869
							(000000000000000),				58.79	29.44	1614.84	1613.83	2	MS2:10__Salt.6853.6853.2.dta
		FDLNTVIAAKPKDEK	9	distinct	1	1
							(000000000000000),				37.77	27.09	1687.91	1687.91	3	MS2:80__Salt.5694.5694.3.dta
							(000000000000000),				85.41	27.09	1687.91	1687.91	2	MS2:80__Salt.5697.5697.2.dta
							(000000000000000),				32.82	26.95	1687.92	1687.91	4	MS2:70__Salt.5738.5738.4.dta
		DRFFLQPLSPTDAAQR	4	distinct	1	0.9849
							(0000000000000000),				56.85	29.78	1860.94	1860.95	2	MS2:80__Salt.7493.7493.2.dta
		VGPPPPPSGGLPGTLNSDEPR	249	distinct	0	1
							(000000000000000000000),				78.46	29.81	2040.03	2040.03	2	MS2:90__Salt_one.5447.5447.2.dta
							(000000000000000000000),				66.32	29.77	2040.03	2040.03	3	MS2:20__Salt.4766.4766.3.dta
		SSPEAEKYYAATVSSLNDVLAK	22	shared(2)	1	1
							(0000000000000000000000),				89.83	29.97	2342.17	2342.16	2	MS2:100_acn_grad.5458.5458.2.dta
							(0000000000000000000000),				43.85	30.15	2342.17	2342.16	3	MS2:70__Salt.9537.9537.3.dta
																	Glyma03g26740.1	24754.3	unknown
5	1
		IWDIR	5	shared(14)	0	0.5354
							(00000),				27.58	31.18	701.386	701.386	1	MS2:10__Salt.4343.4343.1.dta
		IFTGGIDNDVK	6	shared(2)	0	0.9922
							(00000000000),				66.32	29.71	1177.6	1177.6	2	MS2:100_acn_grad.2987.2987.2.dta
		MVYIWDTTSR	8	shared(2)	0	0.9909
							(0000000000),				46.4	30.69	1270.6	1270.6	2	MS2:30__Salt.6294.6294.2.dta
							(0000000000),				30.51	30.71	1270.6	1270.6	1	MS2:100_acn_grad.3987.3987.1.dta
		VLEGHQHNFEK	7	shared(2)	0	0.9607
							(00000000000),				48.15	30.66	1336.65	1336.65	2	MS2:100__Salt_Recal.2304.2304.2.dta
		GPPLVVSGSDDGTAK	2	shared(2)	0	0.8885
							(000000000000000),				34.53	30.12	1399.7	1398.7	2	MS2:40__Salt.3149.3149.2.dta
		FNPAGSVIASGSHDR	28	distinct	0	1
							(000000000000000),				123.31	31.52	1513.71	1513.73	2	MS2:60__Salt_Recal.3124.3124.2.dta
							(000000000000000),				26.69	31.15	1513.73	1513.73	3	MS2:60__Salt.3900.3900.3.dta
		EIFLWNVHGDCK	24	shared(2)	0	0.9948
							(000000000000),				71	31.06	1516.71	1516.71	2	MS2:70__Salt.6848.6848.2.dta
		RGPPLVVSGSDDGTAK	22	shared(2)	1	0.9998
							(0000000000000000),				73.2	29.47	1554.8	1554.8	2	MS2:70__Salt.3034.3034.2.dta
							(0000000000000000),				42.33	29	1555.8	1554.8	3	MS2:80__Salt.3140.3140.3.dta
		MVEHLSYVNSCCPSR	34	shared(2)	0	0.9998
							(000000000000000),				87.12	31.06	1837.79	1837.79	2	MS2:70__Salt.3694.3694.2.dta
							(000000000000000),				30.04	30.96	1837.79	1837.79	3	MS2:70__Salt.3856.3856.3.dta
		KMVEHLSYVNSCCPSR	2	shared(2)	1	0.9742
							(0000000000000000),				27.03	31.07	1966.87	1965.89	2	MS2:100__Salt.3505.3505.2.dta
							(0000000000000000),				35.71	31.12	1966.87	1965.89	3	MS2:90__Salt_two.3480.3480.3.dta
		NAVLDLHWTTDGTQIVSASPDK	6	shared(2)	0	0.9969
							(0000000000000000000000),				72.63	30.31	2367.17	2367.17	2	MS2:80__Salt.8203.8203.2.dta
		TSSLESPIMLLSGHQSAIYTMK	56	shared(2)	0	1
							(0000000000000000000000),				53.96	29.71	2393.2	2393.2	3	MS2:70__Salt.9909.9909.3.dta
							(0000000000000000000000),				80.86	29.75	2393.19	2393.2	2	MS2:80__Salt.9776.9776.2.dta
		GSIQTFPDKYQITAVGFSDASDK	13	shared(2)	1	0.9997
							(00000000000000000000000),				62.25	31.02	2474.2	2474.2	3	MS2:80__Salt.7740.7740.3.dta
							(00000000000000000000000),				47.61	31.13	2474.19	2474.2	2	MS2:80__Salt.7549.7549.2.dta
																	Glyma16g04160.1	38758.9	WD40 REPEAT PROTEIN
6	1
		TLHELK	0	shared(2)	0	0.5072
							(000000),				20.83	24.17	739.422	739.423	1	MS2:80__Salt.2074.2074.1.dta
		LSYWDKVK	3	shared(2)	1	0.8678
							(00000000),				35.42	30.13	1037.55	1037.56	2	MS2:60__Salt.4024.4024.2.dta
		VFVQEVLER	1	shared(2)	0	0.8664
							(000000000),				34.48	28.33	1117.61	1117.61	2	MS2:100_acn_grad.2411.2411.2.dta
		TKNEVVSLQK	2	distinct	1	0.7874
							(0000000000),				28.66	27.84	1144.64	1144.64	2	MS2:80__Salt.2540.2540.2.dta
		SFTHLMTVLER	1	shared(2)	0	0.9795
							(00000000000),				55.49	30.14	1332.69	1332.69	2	MS2:90__Salt_one.7497.7497.2.dta
		SHEFGPICCPR	5	distinct	0	0.9666
							(00000000000),				49.92	30.23	1358.59	1358.59	2	MS2:100__Salt.3691.3691.2.dta
		LPSPPSVPSGVSIGK	6	distinct	0	0.8569
							(000000000000000),				30.68	25.82	1420.8	1420.79	2	MS2:40__Salt.5609.5609.2.dta
		EQWCIITLGYVK	1	distinct	0	0.7889
							(000000000000),				28.52	30.36	1509.77	1508.77	2	MS2:50__Salt.8931.8931.2.dta
		GLGDKDFLEDLWDR	2	distinct	1	0.9776
							(00000000000000),				34.42	30.72	1677.8	1677.8	3	MS2:50__Salt.10722.10722.3.dta
							(00000000000000),				31.34	30.63	1677.8	1677.8	2	MS2:60__Salt.10860.10860.2.dta
		LDAEVLTEDAPLLFR	3	shared(2)	0	0.9956
							(000000000000000),				71.1	28.36	1700.9	1700.9	2	MS2:100_acn_grad.6629.6629.2.dta
		LNIFPPGKIEDLQPIDR	2	distinct	1	0.6845
							(00000000000000000),				23.16	25.58	1965.07	1964.07	3	MS2:90__Salt_two_Recal.7839.7839.3.dta
		IPLYGTLIGLINLENEDFVK	14	shared(2)	0	1
							(00000000000000000000),				30.33	24.15	2260.24	2260.24	3	MS2:10__Salt.14898.14898.3.dta
							(00000000000000000000),				102.4	23.71	2260.24	2260.24	2	MS2:100_acn_grad.9483.9483.2.dta
		EALLAQAMEENEALFLLLYK	32	distinct	0	1
							(00000000000000000000),				108.43	27.68	2308.2	2308.2	2	MS2:20__Salt.14661.14661.2.dta
							(00000000000000000000),				44.85	27.25	2309.2	2308.2	3	MS2:40__Salt.14446.14446.3.dta
		GGPNFSFGAEDGKESNEHVLSGQLNNMVK	4	distinct	1	0.9919
							(00000000000000000000000000000),				61.44	31.19	3062.42	3061.42	3	MS2:90__Salt_one.7671.7671.3.dta
																	Glyma19g27450.1	98444.2	CAP BINDING PROTEIN 80-RELATED
7	1
		GAMIFYR	0	shared(2)	0	0.6248
							(0000000),				24.76	28.36	856.427	856.427	2	MS2:10__Salt.4125.4125.2.dta
		SATLFRPK	13	shared(2)	0	0.9264
							(00000000),				43.38	26.88	918.527	918.529	2	MS2:90__Salt_two.2954.2954.2.dta
		FAQALSER	3	shared(2)	0	0.9514
							(00000000),				46.59	29.1	920.471	920.472	2	MS2:100_acn_grad.1112.1112.2.dta
		MGTPALTSR	2	shared(4)	0	0.8474
							(000000000),				33.38	30.13	932.475	932.475	2	MS2:100_acn_grad.1230.1230.2.dta
		HDVEDYAK	1	distinct	0	0.6324
							(00000000),				23.24	27.9	975.429	975.43	2	MS2:30__Salt.2161.2161.2.dta
		YSEGYPGAR	1	shared(4)	0	0.7053
							(000000000),				26.09	31.06	998.447	998.446	2	MS2:100_acn_grad.780.780.2.dta
		QFPTIGFEK	2	distinct	0	0.7072
							(000000000),				26.09	30.73	1065.55	1065.55	1	MS2:100_acn_grad.3573.3573.1.dta
		GFVEEDFVK	4	shared(2)	0	0.9926
							(000000000),				45.13	31.44	1068.51	1068.51	2	MS2:100_acn_grad.2187.2187.2.dta
							(000000000),				35.35	31.44	1068.51	1068.51	1	MS2:100_acn_grad.2488.2488.1.dta
		LIVAGASAYAR	4	shared(4)	0	0.9983
							(00000000000),				83.22	27.22	1090.61	1090.61	2	MS2:100_acn_grad.2581.2581.2.dta
		VAEFFDAAVK	4	shared(2)	0	0.9971
							(0000000000),				61.88	30.77	1095.56	1095.56	2	MS2:100_acn_grad.3053.3053.2.dta
							(0000000000),				28.2	30.77	1095.56	1095.56	1	MS2:100_acn_grad.3042.3042.1.dta
		VLEAVHIAANK	55	shared(4)	0	0.9999
							(00000000000),				79.64	26.14	1163.66	1163.67	2	MS2:60__Salt.3672.3672.2.dta
							(00000000000),				51.04	25.77	1163.66	1163.67	1	MS2:80__Salt.3480.3480.1.dta
		ALEAFRLDPAK	3	shared(3)	1	0.7421
							(00000000000),				26.34	29.06	1229.67	1229.68	2	MS2:80__Salt.5607.5607.2.dta
		LRHDVEDYAK	5	distinct	1	0.9998
							(0000000000),				48.07	29.75	1244.62	1244.62	3	MS2:90__Salt_one.2711.2711.3.dta
							(0000000000),				48.52	29.75	1244.62	1244.62	2	MS2:80__Salt_Recal.2553.2553.2.dta
							(0000000000),				35.46	29.81	1244.62	1244.62	1	MS2:90__Salt_one.2721.2721.1.dta
		AYQEQVLSNSFK	1	shared(2)	0	0.7374
							(000000000000),				26.13	30.79	1412.69	1412.69	2	MS2:20__Salt.4319.4319.2.dta
		NTVPGDVSAMVPGGIR	8	shared(4)	0	0.997
							(0000000000000000),				58.16	29.59	1569.8	1568.8	2	MS2:10__Salt.5102.5102.2.dta
							(0000000000000000),				28.47	30.17	1568.8	1568.8	3	MS2:10__Salt.6252.6252.3.dta
		ISAVSIFFETMPYR	41	shared(4)	0	0.9997
							(00000000000000),				82.63	30.29	1659.83	1659.83	2	MS2:50__Salt.11367.11367.2.dta
							(00000000000000),				32.55	30.13	1659.83	1659.83	3	MS2:50__Salt.11305.11305.3.dta
		KISAVSIFFETMPYR	1	shared(4)	1	0.7585
							(000000000000000),				25.4	28.76	1787.93	1787.93	2	MS2:100__Salt.10438.10438.2.dta
		GYELVSGGTENHLVLVNLK	59	distinct	0	1
							(0000000000000000000),				47.28	27.42	2041.09	2041.08	3	MS2:60__Salt.7657.7657.3.dta
							(0000000000000000000),				94.18	27.42	2041.09	2041.08	2	MS2:90__Salt_one.8231.8231.2.dta
		YYGGNEYIDMAETLCQK	4	shared(4)	0	0.9997
							(00000000000000000),				102.6	31.02	2053.88	2053.88	2	MS2:10__Salt.7710.7710.2.dta
		YYGGNEYIDMAETLCQKR	10	shared(4)	1	0.9982
							(000000000000000000),				39.77	31.34	2209.98	2209.98	3	MS2:80__Salt.8166.8166.3.dta
							(000000000000000000),				51.74	31.34	2209.98	2209.98	2	MS2:80__Salt.7880.7880.2.dta
		LKDFLATIQSSSTFQSEIAK	38	distinct	1	1
							(00000000000000000000),				74.25	27.55	2213.16	2213.16	2	MS2:90__Salt_one.9352.9352.2.dta
							(00000000000000000000),				80.26	27.57	2213.16	2213.16	3	MS2:90__Salt_two.9327.9327.3.dta
		QLNASLEVVDPEIADIIELEK	8	distinct	0	0.9988
							(000000000000000000000),				83.02	26.91	2337.24	2337.23	2	MS2:100_acn_grad_Recal.7470.7470.2.dta
		QLNASLEVVDPEIADIIELEKAR	1	distinct	1	0.7288
							(00000000000000000000000),				22.47	25.63	2564.37	2564.37	3	MS2:90__Salt_one.11868.11868.3.dta
		GLELIPSENFTSVSVMQAVGSVMTNK	5	shared(2)	0	0.9983
							(00000000000000000000000000),				24.98	29.57	2737.37	2737.37	3	MS2:90__Salt_two.13415.13415.3.dta
							(00000000000000000000000000),				60.31	29.93	2737.35	2737.37	2	MS2:10__Salt.13571.13571.2.dta
																	Glyma18g27710.1	62185.9	SERINE HYDROXYMETHYLTRANSFERASE
8	1
		THFSSIEK	7	shared(2)	0	0.9819
							(00000000),				37.54	29.92	947.471	947.471	2	MS2:60__Salt.2494.2494.2.dta
							(00000000),				32.85	30.06	947.473	947.471	1	MS2:80__Salt.2668.2668.1.dta
		DIMHETKK	2	distinct	1	0.7392
							(00000000),				27.4	28.94	1000.5	1000.5	2	MS2:90__Salt_one.2146.2146.2.dta
		VIDNLVSPGR	2	distinct	0	0.8605
							(0000001000),	(0000002000).			34.03	30.25	1148.56	1148.56	2	MS2:100_acn_grad.2373.2373.2.dta
							(0000000000),				26.02	26.48	1068.59	1068.59	2	MS2:10__Salt.2285.2285.2.dta
		NSIVVADDSVK	1	shared(2)	0	0.7541
							(00000000000),				27.1	30	1145.59	1145.59	2	MS2:30__Salt.2966.2966.2.dta
		SMCLESLHNAR	10	distinct	0	0.9836
							(00000000000),				58.08	30.6	1316.6	1316.6	2	MS2:70__Salt.3553.3553.2.dta
		DCHLVAYFGDR	16	shared(2)	0	1
							(00000000000),				61.04	29.82	1351.6	1351.6	2	MS2:60__Salt.5773.5773.2.dta
							(00000000000),				32.21	29.94	1351.6	1351.6	3	MS2:40__Salt.5360.5360.3.dta
							(00000000000),				66.58	29.8	1351.6	1351.6	1	MS2:40__Salt.5391.5391.1.dta
		EGEFSVSDMVWGK	3	shared(2)	0	0.9462
							(0000000000000),				43.79	30.78	1469.65	1469.65	2	MS2:100_acn_grad.5520.5520.2.dta
		KDCHLVAYFGDR	3	shared(2)	1	0.9961
							(000000000000),				45.99	30.85	1479.69	1479.69	2	MS2:100__Salt.4384.4384.2.dta
							(000000000000),				41.47	30.76	1479.69	1479.69	3	MS2:100__Salt.4422.4422.3.dta
		RAEYGLACSCIPK	22	shared(2)	1	0.9959
							(0000000000000),				47.11	31.32	1523.71	1523.72	2	MS2:70__Salt_Recal.3343.3343.2.dta
							(0000000000000),				39.25	31.33	1523.72	1523.72	3	MS2:70__Salt.4099.4099.3.dta
		VSNTTKPSFLIGDR	15	distinct	0	0.9853
							(00000000000000),				57.78	29.06	1533.81	1533.82	2	MS2:70__Salt.4563.4563.2.dta
		KCVDAEVACSSAQK	3	shared(2)	1	0.9758
							(00000000000000),				52.57	31.07	1551.7	1551.7	2	MS2:80__Salt.2275.2275.2.dta
		TVDHYADDFGKPDGR	13	shared(2)	0	1
							(000000000000000),				41.72	31.34	1691.75	1691.75	3	MS2:70__Salt.3350.3350.3.dta
							(000000000000000),				35.13	31.08	1691.75	1691.75	4	MS2:60__Salt.3322.3322.4.dta
							(000000000000000),				68.85	30.9	1691.74	1691.75	2	MS2:60__Salt_Recal.2695.2695.2.dta
		TFAWNEESQLKPFR	20	shared(2)	0	0.9999
							(00000000000000),				76.42	31.01	1751.86	1751.86	2	MS2:90__Salt_one.7376.7376.2.dta
							(00000000000000),				54.68	31.13	1751.86	1751.86	3	MS2:90__Salt_one.7370.7370.3.dta
		TVDHYADDFGKPDGRK	3	shared(2)	1	0.903
							(0000000000000000),				38.4	31.54	1819.85	1819.85	3	MS2:90__Salt_one.3074.3074.3.dta
		RTVDHYADDFGKPDGR	1	shared(2)	1	0.974
							(0000000000000000),				53.43	31.62	1847.85	1847.86	3	MS2:100__Salt.3092.3092.3.dta
		TLSALPTGGFDRLELEIAK	17	distinct	1	0.9955
							(0000000000000000000),				47.27	25.09	2030.1	2030.11	2	MS2:70__Salt.9946.9946.2.dta
							(0000000000000000000),				30.11	24.81	2030.11	2030.11	3	MS2:60__Salt.9963.9963.3.dta
		SHPWWPGQIFDPSDSSEK	22	shared(2)	0	0.9998
							(000000000000000000),				42.76	31.49	2098.94	2098.94	3	MS2:100__Salt.9031.9031.3.dta
							(000000000000000000),				74.49	31.44	2098.94	2098.94	2	MS2:100__Salt.9037.9037.2.dta
		QSTSESFQNAVDCAVDEVTR	9	shared(2)	0	0.9999
							(00000000000000000000),				114.98	31.45	2241.99	2241.98	2	MS2:100_acn_grad.5952.5952.2.dta
		TDGSTDGFSGNGTDFSFEEAQR	3	distinct	0	0.9995
							(0000000000000000000000),				92.65	30.41	2324.94	2323.95	2	MS2:100_acn_grad.3611.3611.2.dta
		HGVDESLNASSFSPGNLVEYLK	23	distinct	0	0.9997
							(0000000000000000000000),				42.13	30.95	2363.13	2362.14	3	MS2:50__Salt_Recal.9891.9891.3.dta
							(0000000000000000000000),				66.31	30.81	2363.15	2362.14	2	MS2:40__Salt.10560.10560.2.dta
		QSTSESFQNAVDCAVDEVTRR	2	shared(2)	1	0.9794
							(000000000000000000000),				54.11	31.74	2399.09	2398.08	3	MS2:40__Salt.10136.10136.3.dta
		SLSELMGGTPDSPDGDYWSEEK	2	distinct	0	0.9985
							(0000000000010000000000),	(0000000000020000000000).			88.93	30.12	2478.98	2478.98	2	MS2:100_acn_grad_Recal.5306.5306.2.dta
							(0000000020000000000000),	(0000000020000000000000).			51.31	30.17	2478.98	2478.98	2	MS2:100_acn_grad.5141.5141.2.dta
							(0010000000000000000000),	(0010000000000000000000).			36.21	30.17	2478.98	2478.98	2	MS2:100_acn_grad.5141.5141.2.dta
							(1000000000000000000000),	(1000000000000000000000).			35.55	30.17	2478.98	2478.98	2	MS2:100_acn_grad.5141.5141.2.dta
		VIDDGSEVKPVQLSQPAQPSQPAR	17	distinct	0	0.9998
							(000000000000000000000000),				58.57	28.16	2545.32	2545.31	3	MS2:90__Salt_one.4320.4320.3.dta
							(000000000000000000000000),				50.84	28.34	2545.31	2545.31	2	MS2:90__Salt_two.4308.4308.2.dta
		SQKTDGSTDGFSGNGTDFSFEEAQR	4	distinct	1	0.9821
							(0000000000000000000000000),				53.92	31.21	2667.13	2667.13	3	MS2:50__Salt.5846.5846.3.dta
		VIDDGSEVKPVQLSQPAQPSQPARR	2	distinct	1	0.9989
							(0000000000000000000000000),				58.4	26.67	2702.4	2701.41	3	MS2:100__Salt.4181.4181.3.dta
							(0000000000000000000000000),				30.67	26.92	2702.4	2701.41	4	MS2:100__Salt.4184.4184.4.dta
		KLPPAGLPESFEFDDMSDTYWTDR	2	distinct	1	0.9264
							(000000000000000000000000),				38.32	31.55	2817.27	2816.26	3	MS2:70__Salt.10581.10581.3.dta
		GYSCLPELQYCGGFDDDMDSLVHDDENNHAAPVSK	2	distinct	0	1
							(00000000000000000000000000000000000),				43.56	30.53	3955.64	3954.64	4	MS2:40__Salt.9512.9512.4.dta
							(00000000000000000000000000000000000),				84.54	30.39	3955.64	3954.64	3	MS2:50__Salt.9501.9501.3.dta
																	Glyma10g22590.1	82706.5	unknown
9	1
		QLYEHLGCK	1	distinct	0	0.7631
							(000000000),				28.46	30.54	1146.55	1146.55	2	MS2:50__Salt.2990.2990.2.dta
		DLSMNILPVR	1	distinct	0	0.7933
							(0000000000),				29.1	28.34	1156.63	1156.63	2	MS2:10__Salt.6236.6236.2.dta
		ALESTESHVSR	8	distinct	0	0.9981
							(00000000000),				82.58	30.46	1214.59	1214.59	2	MS2:80__Salt.2028.2028.2.dta
		KALESTESHVSR	1	distinct	1	0.9517
							(000000000000),				47.59	29.89	1343.69	1342.68	3	MS2:80__Salt.1962.1962.3.dta
		FAETTSIWGTKK	1	distinct	1	0.9213
							(000000000000),				39.58	29.53	1367.71	1367.71	2	MS2:70__Salt.4706.4706.2.dta
		YALGVLDKEAGTLK	24	distinct	1	0.9998
							(00000000000000),				80.03	26.47	1476.82	1476.82	2	MS2:90__Salt_one.6224.6224.2.dta
							(00000000000000),				36.63	26.63	1476.82	1476.82	3	MS2:90__Salt_one.6212.6212.3.dta
		FKDQHSFDVLSAK	2	distinct	1	0.999
							(0000000000000),				88.9	30.35	1520.76	1520.76	2	MS2:100__Salt.4284.4284.2.dta
		LALRQDEDPDSQR	3	distinct	1	0.9781
							(0000000000000),				54.08	31.01	1541.74	1541.74	2	MS2:60__Salt.2978.2978.2.dta
		SSVEFVGTSYAGEAAAR	1	distinct	0	0.9476
							(00000000000000000),				42.6	31.26	1700.8	1700.8	2	MS2:20__Salt.4679.4679.2.dta
		TPPVVGYFPSGFDPVK	3	distinct	0	0.9645
							(0000000000000000),				46.97	29.23	1705.88	1705.87	2	MS2:10__Salt.8884.8884.2.dta
		GEWDYLEDIYNNLQR	6	distinct	0	1
							(000000000000000),				90.47	31.4	1926.88	1926.88	2	MS2:100_acn_grad_Recal.7432.7432.2.dta
							(000000000000000),				45.17	31.4	1926.88	1926.88	3	MS2:100_acn_grad.7204.7204.3.dta
		VKGVGAFENEPANSTLEEMTQQQK	3	distinct	1	0.8873
							(000000000000000000000000),				33.25	30.65	2634.26	2634.26	3	MS2:90__Salt_two.6662.6662.3.dta
																	Glyma15g17850.1	48920.8	unknown
																	Glyma15g17850.2	47555.1	unknown
10	1
		HLQEFR	7	distinct	0	0.9684
							(000000),				26.92	26.92	828.424	828.424	1	MS2:100__Salt.2603.2603.1.dta
							(000000),				36.58	26.89	828.423	828.424	2	MS2:90__Salt_two.2464.2464.2.dta
		GFQGGIKR	1	distinct	1	0.708
							(00000000),				27.97	30.34	861.474	861.482	2	MS2:80__Salt.2225.2225.2.dta
		QLGSIGAGTTPGR	3	distinct	0	0.895
							(0000000000000),				35.78	29.06	1213.64	1213.64	2	MS2:100_acn_grad.2117.2117.2.dta
		IDKDLNVVMIK	11	distinct	1	0.9996
							(00000000000),				73.37	27.92	1286.72	1286.73	2	MS2:40__Salt_Recal.4222.4222.2.dta
							(00000000000),				40.3	27.44	1286.73	1286.73	3	MS2:60__Salt.5347.5347.3.dta
		LQAIDGFDLNQR	3	distinct	0	0.9906
							(000000000000),				63.98	30.2	1388.71	1388.7	2	MS2:100_acn_grad.4423.4423.2.dta
		TEATDGYDAVQVGYR	2	distinct	0	0.9998
							(000000000000000),				109.29	31.44	1643.74	1643.74	2	MS2:100_acn_grad.3169.3169.2.dta
		TEATDGYDAVQVGYRR	3	distinct	1	0.7889
							(0000000000000000),				27.12	31.3	1799.84	1799.84	2	MS2:50__Salt.4031.4031.2.dta
		LVFDEIFKEGDLVDVSGTTIGK	7	distinct	1	0.9156
							(0000000000000000000000),				34.42	28.19	2382.24	2381.24	2	MS2:80__Salt.11296.11296.2.dta
		LGMMSYFESDGEVVPVTVVGFK	3	distinct	0	0.9945
							(0000000000000000000000),				66.23	30.69	2390.16	2390.15	2	MS2:10__Salt.10151.10151.2.dta
																	Glyma04g00360.1	28944.6	50S RIBOSOMAL PROTEIN L3
11	1
		IIDHVLSR	3	distinct	0	0.9431
							(00000000),				46.07	25.37	951.55	951.55	2	MS2:90__Salt_one.3434.3434.2.dta
		LLVDFDPSK	11	shared(2)	0	0.9992
							(000000000),				53.95	29.99	1032.55	1032.55	2	MS2:40__Salt.6013.6013.2.dta
							(000000000),				51.74	30.39	1032.55	1032.55	1	MS2:100_acn_grad.3277.3277.1.dta
		YPIFGPVVR	4	distinct	0	0.8394
							(000000000),				32.22	27.64	1046.59	1046.59	2	MS2:20__Salt.5914.5914.2.dta
		LVDDTVSAIK	1	shared(2)	0	0.9117
							(0000000000),				39.14	29.83	1059.58	1059.58	2	MS2:100_acn_grad.1817.1817.2.dta
		SIYFLKPPK	2	shared(2)	0	0.9125
							(000000000),				38.4	24.46	1091.64	1091.64	2	MS2:100__Salt_Recal.4428.4428.2.dta
		AQFIQVTWR	3	distinct	0	0.953
							(000000000),				46.49	28.73	1147.61	1147.61	2	MS2:10__Salt.6398.6398.2.dta
		LVEVPGFFVR	3	shared(2)	0	0.9154
							(0000000000),				39.05	27.31	1161.65	1161.65	2	MS2:10__Salt.8405.8405.2.dta
		KPLLVVYPAAK	11	shared(2)	0	0.9939
							(00000000000),				66.85	19.64	1197.75	1197.75	2	MS2:80__Salt_Recal.3905.3905.2.dta
		EINDNFLLKR	2	distinct	1	0.8788
							(0000000000),				35.37	29.11	1260.68	1260.68	2	MS2:50__Salt.5119.5119.2.dta
		TSIDKIPNDFK	14	shared(2)	1	0.9855
							(00000000000),				29.69	30.04	1276.67	1276.67	3	MS2:80__Salt.4482.4482.3.dta
							(00000000000),				43.2	30.04	1276.67	1276.67	2	MS2:80__Salt.4489.4489.2.dta
		SYEDKIHGILSK	7	shared(2)	1	0.9996
							(000000000000),				27.11	29.74	1388.73	1388.73	3	MS2:90__Salt_one.4990.4990.3.dta
							(000000000000),				86.1	29.64	1388.73	1388.73	2	MS2:90__Salt_one.4979.4979.2.dta
		EVTVDHSHQFSK	9	distinct	0	0.9913
							(000000000000),				65.11	31.31	1412.67	1412.67	2	MS2:90__Salt_one.2698.2698.2.dta
		FVTDIGADKVEFK	22	shared(2)	1	0.9999
							(0000000000000),				78.7	29.36	1467.76	1467.76	2	MS2:100_acn_grad.3405.3405.2.dta
							(0000000000000),				52.88	29.31	1467.76	1467.76	3	MS2:50__Salt.5986.5986.3.dta
		TPLNNYDAVVILHK	14	distinct	0	1
							(00000000000000),				61.29	26.56	1595.87	1595.87	3	MS2:50__Salt.6388.6388.3.dta
							(00000000000000),				74.04	26.56	1595.87	1595.87	2	MS2:60__Salt.6491.6491.2.dta
		ECFHEKDYLNYR	2	shared(2)	1	0.9732
							(000000000000),				52.13	30.7	1672.73	1672.73	2	MS2:90__Salt_one.4147.4147.2.dta
		EVFASGFCLDDECWR	2	shared(2)	0	0.9918
							(000000000000000),				64.37	30.31	1889.77	1889.77	2	MS2:100_acn_grad.4739.4739.2.dta
		SPSIDRVEWSTLQNEAR	16	shared(2)	1	1
							(00000000000000000),				70.8	30.78	1986.98	1986.98	3	MS2:80__Salt.6629.6629.3.dta
							(00000000000000000),				63.6	30.85	1987.97	1986.98	2	MS2:50__Salt_Recal.5376.5376.2.dta
		MVDIGPNAESKEEALEFR	11	shared(2)	1	1
							(000000000000000000),				63.27	30.88	2033.97	2033.97	3	MS2:50__Salt.6322.6322.3.dta
							(000000000000000000),				78.25	30.78	2033.97	2033.97	2	MS2:70__Salt.6625.6625.2.dta
		LIEDLPLKVSSVQPLDSAFR	7	shared(2)	1	0.9815
							(00000000000000000000),				19.76	23.44	2226.23	2226.23	3	MS2:90__Salt_two.10048.10048.3.dta
							(00000000000000000000),				39.99	23.54	2226.22	2226.23	2	MS2:90__Salt_two.9943.9943.2.dta
		LLSHYDWTFSPLVVDINHDLSPSDEK	1	distinct	0	0.9015
							(00000000000000000000000000),				33.8	29.89	3027.47	3026.47	3	MS2:90__Salt_two.11418.11418.3.dta
																	Glyma11g07340.1	120458	NUCLEOLAR RNA-ASSOCIATED PROTEIN
12	1
		IWDIR	5	shared(14)	0	0.5354
							(00000),				27.58	31.18	701.386	701.386	1	MS2:10__Salt.4343.4343.1.dta
		HISDYGK	11	shared(2)	0	0.9472
							(0000000),				26.11	29.1	818.392	818.392	2	MS2:50__Salt.1894.1894.2.dta
							(0000000),				32.46	29.13	818.393	818.392	1	MS2:60__Salt.1724.1724.1.dta
		NSGLLFEK	1	shared(2)	0	0.7753
							(00000000),				29.19	29.34	906.481	906.481	2	MS2:100_acn_grad.2865.2865.2.dta
		YIAVGSMDR	6	shared(2)	0	0.9231
							(000000000),				41.48	31.33	1010.49	1010.49	2	MS2:100_acn_grad.1205.1205.2.dta
		NSGLLFEKR	14	shared(2)	1	0.9988
							(000000000),				61.79	28.97	1062.58	1062.58	2	MS2:90__Salt_two.4029.4029.2.dta
							(000000000),				38.32	28.66	1062.59	1062.58	1	MS2:80__Salt.3855.3855.1.dta
		IFGLPGEDAPTES	7	shared(2)	0	0.9938
							(0000000000000),				27.21	30.97	1331.63	1331.62	2	MS2:100_acn_grad.4461.4461.2.dta
							(0000000000000),				51.71	31	1331.63	1331.62	1	MS2:100_acn_grad.5158.5158.1.dta
		QGIISIDILYSK	10	shared(2)	0	0.9978
							(000000000000),				87.36	26.36	1348.76	1348.76	2	MS2:20__Salt.8796.8796.2.dta
		FVAQGESFLTASADK	6	shared(2)	0	0.9999
							(000000000000000),				110.91	30.94	1569.77	1569.77	2	MS2:100_acn_grad.3413.3413.2.dta
		LWQGSDDGNYNCR	7	shared(2)	0	0.9981
							(0000000000000),				81.51	30.1	1583.64	1583.64	2	MS2:40__Salt.3176.3176.2.dta
		QELSHALYQHDAACR	21	shared(2)	0	1
							(000000000000000),				55.16	31.13	1797.82	1797.82	3	MS2:90__Salt_two.3141.3141.3.dta
							(000000000000000),				82.64	31.16	1797.82	1797.82	2	MS2:90__Salt_two.3144.3144.2.dta
							(000000000000000),				31.15	31.13	1797.82	1797.82	4	MS2:90__Salt_two.3153.3153.4.dta
		CPITGEPLTMDDIVPIK	11	shared(2)	0	0.9996
							(00000000000000000),				98.36	29.91	1897.95	1897.95	2	MS2:100_acn_grad.5354.5354.2.dta
		FVAQGESFLTASADKTVR	14	shared(2)	1	0.9999
							(000000000000000000),				38.53	29.64	1925.98	1925.98	3	MS2:80__Salt.6194.6194.3.dta
							(000000000000000000),				82.89	29.6	1925.99	1925.98	2	MS2:70__Salt.6480.6480.2.dta
		QFPVSAPNAITANAPVLSNGK	1	distinct	0	0.966
							(000000000000000000000),				45.26	28.47	2096.09	2095.11	2	MS2:10__Salt.6973.6973.2.dta
		CPITGEPLTMDDIVPIKTGK	53	shared(2)	1	1
							(00000000000000000000),				78.12	28.95	2184.12	2184.12	3	MS2:50__Salt.8403.8403.3.dta
							(00000000000000000000),				94.96	28.8	2184.12	2184.12	2	MS2:70__Salt.8697.8697.2.dta
		QFPVSAPNAITANAPVLSNGKR	1	distinct	1	0.7535
							(0000000000000000000000),				24.2	26.65	2252.19	2251.21	3	MS2:100__Salt.7165.7165.3.dta
		IHPGISSSIISELTDCNAALSQQR	9	distinct	0	0.9968
							(000000000000000000000000),				73.83	29.99	2596.29	2596.29	3	MS2:90__Salt_one.9849.9849.3.dta
		HISDYGKCPITGEPLTMDDIVPIK	6	shared(2)	1	0.9995
							(000000000000000000000000),				70.93	29.8	2698.34	2698.34	3	MS2:90__Salt_two.8644.8644.3.dta
							(000000000000000000000000),				30.02	29.76	2698.34	2698.34	4	MS2:90__Salt_two.8620.8620.4.dta
		FDGHAGPVTAISFSENGYFLATAAHDGVK	10	shared(2)	0	0.998
							(00000000000000000000000000000),				49.97	30.86	2979.4	2978.42	3	MS2:90__Salt_two.9654.9654.3.dta
							(00000000000000000000000000000),				31.51	30.88	2979.4	2978.42	4	MS2:100__Salt.10015.10015.4.dta
		DLIATGGIDTNAVIFDRPSGQILSTLSGHSK	18	distinct	0	0.9993
							(0000000000000000000000000000000),				87.45	26.46	3182.66	3182.66	3	MS2:80__Salt.10912.10912.3.dta
		NFAPYDSETPTSSVEFDHSGSYLAVAGSDIR	95	shared(2)	0	0.9988
							(0000000000000000000000000000000),				82.38	31.49	3318.5	3318.49	3	MS2:80__Salt.8790.8790.3.dta
																	Glyma20g21330.1	57566.9	WD40 REPEAT PROTEIN
13	1
		RVAAMSVAK	4	shared(2)	1	0.9611
							(000000000),				48.36	27.51	932.53	931.527	2	MS2:90__Salt_two.2295.2295.2.dta
		DSDTSLLEHK	1	distinct	0	0.793
							(0000000000),				29.44	29.89	1144.54	1143.54	2	MS2:40__Salt.2843.2843.2.dta
		MVEFPLDPPLAK	3	distinct	0	0.8105
							(000000000000),				29.38	28.77	1355.71	1355.72	2	MS2:10__Salt.6656.6656.2.dta
		MGMDALQVFPVSR	2	distinct	0	0.9588
							(0000000000000),				46.92	31.06	1450.72	1449.71	2	MS2:10__Salt.7951.7951.2.dta
		IPLTSCWPDTDIVR	3	distinct	0	0.9953
							(00000000000000),				71.14	30.49	1671.83	1671.83	2	MS2:10__Salt.7768.7768.2.dta
		KLSQLTADNAQWEDR	3	distinct	1	1
							(000000000000000),				28.08	30.76	1773.87	1773.87	3	MS2:60__Salt.4459.4459.3.dta
							(000000000000000),				112.36	30.75	1773.86	1773.87	2	MS2:60__Salt.4444.4444.2.dta
		IPLTSCWPDTDIVRK	2	distinct	1	0.9886
							(000000000000000),				36.38	29.26	1800.93	1799.92	3	MS2:70__Salt.7143.7143.3.dta
							(000000000000000),				40.68	29.16	1800.93	1799.92	2	MS2:70__Salt.7169.7169.2.dta
		LLILPIYSQLPADLQAK	7	distinct	0	0.9774
							(00000000000000000),				49.04	17.71	1895.11	1895.11	2	MS2:100_acn_grad.6822.6822.2.dta
		QAEPIMPLKDPTSDMAIISR	1	distinct	1	0.9741
							(00000000000000000000),				51.42	29.72	2213.11	2212.12	3	MS2:50__Salt_Recal.7097.7097.3.dta
		FFVPESDHLTLYNVYQQWK	2	distinct	0	0.8307
							(0000000000000000000),				30.65	30.73	2413.18	2413.17	3	MS2:90__Salt_one.10889.10889.3.dta
																	Glyma13g41740.1	144180	ATP-DEPENDENT RNA HELICASE
																	Glyma15g03660.1	144116	ATP-DEPENDENT RNA HELICASE
																	Glyma15g03660.2	143988	unknown
14	1
		GKYEFGDLR	13	distinct	1	0.9962
							(000000000),				58.29	29.85	1083.53	1083.54	2	MS2:70__Salt.4192.4192.2.dta
							(000000000),				28.93	29.75	1083.54	1083.54	1	MS2:70__Salt.4202.4202.1.dta
		SWEFLGLDSNNK	5	distinct	0	0.99
							(000000000000),				63.35	30.58	1408.66	1408.66	2	MS2:10__Salt.6615.6615.2.dta
		FQVIVQASSVTTR	1	shared(2)	0	0.8965
							(0000000000000),				35.77	28.33	1434.78	1434.78	2	MS2:10__Salt.4799.4799.2.dta
		GGNVCQINKLPGSK	37	shared(2)	1	0.9992
							(00000000000000),				65.77	29.8	1470.76	1470.76	2	MS2:90__Salt_one.3304.3304.2.dta
							(00000000000000),				36.97	29.8	1470.76	1470.76	3	MS2:90__Salt_one.3479.3479.3.dta
		FTDEVSIGALHAIAR	24	distinct	0	0.9999
							(000000000000000),				63.4	28.8	1598.84	1598.84	3	MS2:90__Salt_two.7497.7497.3.dta
							(000000000000000),				58.92	29.28	1598.84	1598.84	2	MS2:90__Salt_one.7598.7598.2.dta
		SWEFLGLDSNNKDSAWQK	44	distinct	1	1
							(000000000000000000),				53.1	31.44	2123.98	2123.99	3	MS2:50__Salt_Recal.7652.7653.3.dta
							(000000000000000000),				101.24	31.13	2123.99	2123.99	2	MS2:70__Salt.9055.9055.2.dta
		FNVLQGTSVSCPHVAGIAGLIK	12	distinct	0	0.9688
							(0000000000000000000000),				47.72	26.48	2267.21	2267.21	3	MS2:90__Salt_one.9666.9666.3.dta
		ITSVAEGQEALSNGAVAMLLGNQNQNGR	3	distinct	0	0.9732
							(0000000000000000000000000000),				47.75	29.54	2842.41	2841.4	3	MS2:10__Salt.8195.8195.3.dta
		GCDSVTDLNYPSITLPNLGLKPLTITR	22	distinct	0	0.9998
							(000000000000000000000000000),				101.47	26.21	2957.55	2957.55	3	MS2:100__Salt.11442.11442.3.dta
		FGENTIIGNIDTGVWPESESFSDNGFGSVPSK	1	distinct	0	0.8996
							(00000000000000000000000000000000),				31.5	31.4	3387.57	3386.56	3	MS2:10__Salt.9601.9601.3.dta
																	Glyma18g48490.1	81646.5	SUBTILISIN/KEXIN-RELATED SERINE PROTEASE
15	1
		GLHGIFER	7	distinct	0	0.9723
							(00000000),				31.27	27.03	927.491	927.493	2	MS2:100__Salt.4015.4015.2.dta
							(00000000),				33	27.59	927.492	927.493	1	MS2:100__Salt.4028.4028.1.dta
		LTWDALRK	1	distinct	1	0.7738
							(00000000),				30.48	28.77	1001.57	1001.57	2	MS2:60__Salt.4645.4645.2.dta
		FPEVGDLLLR	5	distinct	0	0.9586
							(0000000000),				47.61	29.1	1157.64	1157.64	2	MS2:100_acn_grad.5504.5504.2.dta
		NDKPQLLAAVK	4	distinct	0	0.9818
							(00000000000),				55.6	24.98	1195.69	1195.69	2	MS2:60__Salt.3869.3869.2.dta
		GILHEGEIDKR	6	distinct	1	0.9857
							(00000000000),				41.91	29.62	1265.67	1265.67	2	MS2:90__Salt_one_Recal.2742.2742.2.dta
							(00000000000),				30.81	29.15	1265.68	1265.67	3	MS2:90__Salt_one_Recal.2428.2428.3.dta
		FPEVGDLLLRR	3	distinct	1	0.9021
							(00000000000),				39.15	26.5	1314.75	1313.75	3	MS2:90__Salt_two_Recal.7461.7461.3.dta
		SGSESEDEER	1	distinct	0	0.4583
							(1010100000),	(1010100000).			14.99	14.91	1363.33	1363.33	2	MS2:30__Salt.1051.1051.2.dta
		VQFLIEGLFAIR	10	distinct	0	0.9475
							(000000000000),				42.84	23.75	1404.81	1404.81	2	MS2:90__Salt_one.13023.13023.2.dta
		NIIPELFAENLIR	3	distinct	0	0.8832
							(0000000000000),				33.7	25.34	1540.86	1540.86	2	MS2:100_acn_grad_Recal.7258.7258.2.dta
		ILFQELSEHLGIR	13	distinct	0	0.9999
							(0000000000000),				76.97	25.98	1553.86	1553.86	2	MS2:90__Salt_two.9924.9924.2.dta
							(0000000000000),				46.07	26.72	1554.86	1553.86	3	MS2:90__Salt_two_Recal.9151.9151.3.dta
		RGTIPGGNLNGDVSNLGK	1	distinct	1	0.9908
							(000000000000000000),				61.57	29.12	1767.92	1767.92	2	MS2:90__Salt_two.4622.4622.2.dta
		SQMASPGFTDVFAALVAVVNTK	3	distinct	0	0.85
							(0000000000000000000000),				30.29	28.47	2253.16	2252.15	3	MS2:60__Salt.14708.14708.3.dta
																	Glyma13g24660.1	99761.3	CELL CYCLE CONTROL PROTEIN CWF22
16	1
		IWDIR	5	shared(14)	0	0.5354
							(00000),				27.58	31.18	701.386	701.386	1	MS2:10__Salt.4343.4343.1.dta
		HISDYGK	11	shared(2)	0	0.9472
							(0000000),				26.11	29.1	818.392	818.392	2	MS2:50__Salt.1894.1894.2.dta
							(0000000),				32.46	29.13	818.393	818.392	1	MS2:60__Salt.1724.1724.1.dta
		NSGLLFEK	1	shared(2)	0	0.7753
							(00000000),				29.19	29.34	906.481	906.481	2	MS2:100_acn_grad.2865.2865.2.dta
		YIAVGSMDR	6	shared(2)	0	0.9231
							(000000000),				41.48	31.33	1010.49	1010.49	2	MS2:100_acn_grad.1205.1205.2.dta
		NSGLLFEKR	14	shared(2)	1	0.9988
							(000000000),				61.79	28.97	1062.58	1062.58	2	MS2:90__Salt_two.4029.4029.2.dta
							(000000000),				38.32	28.66	1062.59	1062.58	1	MS2:80__Salt.3855.3855.1.dta
		IFGLPGEDAPTES	7	shared(2)	0	0.9938
							(0000000000000),				27.21	30.97	1331.63	1331.62	2	MS2:100_acn_grad.4461.4461.2.dta
							(0000000000000),				51.71	31	1331.63	1331.62	1	MS2:100_acn_grad.5158.5158.1.dta
		QGIISIDILYSK	10	shared(2)	0	0.9978
							(000000000000),				87.36	26.36	1348.76	1348.76	2	MS2:20__Salt.8796.8796.2.dta
		FVAQGESFLTASADK	6	shared(2)	0	0.9999
							(000000000000000),				110.91	30.94	1569.77	1569.77	2	MS2:100_acn_grad.3413.3413.2.dta
		LWQGSDDGNYNCR	7	shared(2)	0	0.9981
							(0000000000000),				81.51	30.1	1583.64	1583.64	2	MS2:40__Salt.3176.3176.2.dta
		QELSHALYQHDAACR	21	shared(2)	0	1
							(000000000000000),				55.16	31.13	1797.82	1797.82	3	MS2:90__Salt_two.3141.3141.3.dta
							(000000000000000),				82.64	31.16	1797.82	1797.82	2	MS2:90__Salt_two.3144.3144.2.dta
							(000000000000000),				31.15	31.13	1797.82	1797.82	4	MS2:90__Salt_two.3153.3153.4.dta
		CPITGEPLTMDDIVPIK	11	shared(2)	0	0.9996
							(00000000000000000),				98.36	29.91	1897.95	1897.95	2	MS2:100_acn_grad.5354.5354.2.dta
		FVAQGESFLTASADKTVR	14	shared(2)	1	0.9999
							(000000000000000000),				38.53	29.64	1925.98	1925.98	3	MS2:80__Salt.6194.6194.3.dta
							(000000000000000000),				82.89	29.6	1925.99	1925.98	2	MS2:70__Salt.6480.6480.2.dta
		CPITGEPLTMDDIVPIKTGK	53	shared(2)	1	1
							(00000000000000000000),				78.12	28.95	2184.12	2184.12	3	MS2:50__Salt.8403.8403.3.dta
							(00000000000000000000),				94.96	28.8	2184.12	2184.12	2	MS2:70__Salt.8697.8697.2.dta
		QFPASAPNAITANDPVLSNGKR	6	distinct	1	0.9903
							(0000000000000000000000),				24.21	28.64	2268.15	2267.17	2	MS2:50__Salt.6349.6349.2.dta
							(0000000000000000000000),				43.71	28.69	2268.15	2267.17	3	MS2:90__Salt_two.6178.6178.3.dta
		IHPGISSSIISELTDCNASLSQQR	8	distinct	0	0.996
							(000000000000000000000000),				71.27	30.73	2612.27	2612.29	3	MS2:80__Salt_Recal.8606.8606.3.dta
		HISDYGKCPITGEPLTMDDIVPIK	6	shared(2)	1	0.9995
							(000000000000000000000000),				70.93	29.8	2698.34	2698.34	3	MS2:90__Salt_two.8644.8644.3.dta
							(000000000000000000000000),				30.02	29.76	2698.34	2698.34	4	MS2:90__Salt_two.8620.8620.4.dta
		FDGHAGPVTAISFSENGYFLATAAHDGVK	10	shared(2)	0	0.998
							(00000000000000000000000000000),				49.97	30.86	2979.4	2978.42	3	MS2:90__Salt_two.9654.9654.3.dta
							(00000000000000000000000000000),				31.51	30.88	2979.4	2978.42	4	MS2:100__Salt.10015.10015.4.dta
		DLIATGGIDTNAVIFDRPSGQILATLSGHSK	1	distinct	0	0.8456
							(0000000000000000000000000000000),				25.49	24.93	3167.67	3166.66	3	MS2:90__Salt_one.16386.16386.3.dta
		NFAPYDSETPTSSVEFDHSGSYLAVAGSDIR	95	shared(2)	0	0.9988
							(0000000000000000000000000000000),				82.38	31.49	3318.5	3318.49	3	MS2:80__Salt.8790.8790.3.dta
																	Glyma10g26870.1	57532.8	WD40 REPEAT PROTEIN
17	1
		LIDCLER	2	distinct	0	0.9335
							(0000000),				43.69	30.23	917.464	917.464	2	MS2:100_acn_grad.1566.1566.2.dta
		FAQYLGIK	1	distinct	0	0.9328
							(00000000),				24.17	27.08	938.522	938.523	1	MS2:100_acn_grad.3118.3118.1.dta
							(00000000),				30.05	27.7	938.522	938.523	2	MS2:100_acn_grad.3127.3127.2.dta
		EISLEGFR	2	distinct	0	0.9869
							(00000000),				27.37	29.54	949.485	949.487	2	MS2:100_acn_grad.3059.3059.2.dta
							(00000000),				46.42	29.38	949.487	949.487	1	MS2:100_acn_grad.3988.3988.1.dta
		LLDELNDK	2	distinct	0	0.6866
							(00000000),				25.3	28.93	958.496	958.497	2	MS2:40__Salt.3639.3639.2.dta
		NLDKDGYR	1	distinct	1	0.9391
							(00000000),				44.13	29.59	979.472	979.472	2	MS2:50__Salt.2032.2032.2.dta
		TAIVFVNTK	1	distinct	0	0.7905
							(000000000),				28.86	26.22	991.57	991.57	2	MS2:30__Salt.4051.4051.2.dta
		RQEQLLSR	3	distinct	1	0.9623
							(00000000),				49.47	29.05	1029.58	1028.57	2	MS2:80__Salt.2557.2557.2.dta
		KLEEMTER	2	distinct	1	0.922
							(00000000),				41.39	29.92	1034.51	1034.51	2	MS2:60__Salt.2519.2519.2.dta
		NPVVVTIGTAGK	2	distinct	0	0.9588
							(000000000000),				45.9	24.93	1154.67	1154.67	1	MS2:100_acn_grad.2560.2560.1.dta
		YNVLVATDVAGR	5	distinct	0	0.9722
							(000000000000),				51.51	29.85	1276.68	1276.68	2	MS2:100_acn_grad.3400.3400.2.dta
		RYNVLVATDVAGR	5	distinct	1	0.9921
							(0000000000000),				43.18	27.8	1432.78	1432.78	2	MS2:100__Salt.4557.4557.2.dta
							(0000000000000),				34.11	28.46	1432.78	1432.78	3	MS2:100__Salt.4593.4593.3.dta
		IFREDYNISYK	21	distinct	1	0.9922
							(00000000000),				46.26	30.31	1446.71	1446.71	2	MS2:90__Salt_one.5143.5143.2.dta
							(00000000000),				33.71	30.19	1446.71	1446.71	3	MS2:80__Salt.4813.4813.3.dta
		ATDLISQHVIMMK	22	distinct	0	0.9998
							(0000000000000),				91.59	29.75	1485.77	1485.77	2	MS2:90__Salt_one.6455.6455.2.dta
							(0000000000000),				26.47	29.77	1485.77	1485.77	3	MS2:70__Salt.5973.5973.3.dta
		EAAADLYDTFDMR	6	distinct	0	0.9827
							(0000000000000),				56.78	30.85	1517.66	1516.65	2	MS2:100_acn_grad_Recal.4645.4645.2.dta
		ELESIKEQYLGSK	8	distinct	1	0.9973
							(0000000000000),				77.82	30.35	1522.79	1522.79	2	MS2:40__Salt.4262.4262.2.dta
		TAAFVLPMLSYITR	9	distinct	0	0.9956
							(00000000000000),				70.98	27.13	1581.86	1581.86	2	MS2:10__Salt.12023.12023.2.dta
		KEAAADLYDTFDMR	2	distinct	1	1
							(00000000000000),				38.65	31.51	1644.74	1644.74	3	MS2:40__Salt.6408.6408.3.dta
							(00000000000000),				98.92	31.44	1644.74	1644.74	2	MS2:40__Salt.6427.6427.2.dta
		VVSIVGGQSIEEQGFK	6	distinct	0	0.9977
							(0000000000000000),				78.13	29	1675.88	1675.88	2	MS2:10__Salt.5481.5481.2.dta
		QMLIQSNSPVPPELAR	8	distinct	0	0.9755
							(0000000000000000),				50.98	28.23	1778.93	1778.93	2	MS2:30__Salt.6169.6169.2.dta
		TPSPIQMAAIPLGLQQR	36	distinct	0	0.9999
							(00000000000000000),				60.91	25.8	1820	1820	3	MS2:10__Salt.9288.9288.3.dta
							(00000000000000000),				58.27	25.55	1820	1820	2	MS2:10__Salt.9214.9214.2.dta
		LLDELNDKTAIVFVNTK	8	distinct	1	0.9871
							(00000000000000000),				45.3	25.12	1933.06	1932.06	2	MS2:70__Salt.8143.8143.2.dta
							(00000000000000000),				21.88	25.6	1932.06	1932.06	3	MS2:80__Salt.8238.8238.3.dta
		RYAVLNQCNYVVLDEADR	1	distinct	1	0.7977
							(000000000000000000),				29.04	30.79	2198.06	2197.06	3	MS2:60__Salt.6809.6809.3.dta
		TGVATTFLTLHDSDVFYDLK	55	distinct	0	1
							(00000000000000000000),				68.67	29.79	2242.11	2242.12	3	MS2:40__Salt.10694.10694.3.dta
							(00000000000000000000),				76.62	29.85	2242.12	2242.12	2	MS2:90__Salt_one.10844.10844.2.dta
		LPPISEDNEAEGPYAVVMAPTR	16	distinct	0	1
							(0000000000000000000000),				121.9	30.69	2355.14	2355.14	2	MS2:100_acn_grad.4619.4619.2.dta
							(0000000000000000000000),				49.16	30.77	2355.14	2355.14	3	MS2:10__Salt.7756.7756.3.dta
		GIDIPDVAHVINYDMPGNIEMYTHR	8	distinct	0	0.9867
							(0000000000000000000000000),				57.27	30.94	2869.36	2869.35	3	MS2:100__Salt.11032.11032.3.dta
		MIDMGFEPQVMGVLDAMPSSNLKPENEDEELDEK	2	distinct	0	0.9998
							(0000000000000000000000000000000000),				99.33	30.55	3837.72	3836.71	3	MS2:100_acn_grad.6908.6908.3.dta
																	Glyma17g00860.1	77679	DEAD BOX ATP-DEPENDENT RNA HELICASE
18	1
		FSLGVSDPK	2	shared(3)	0	0.9914
							(000000000),				67.38	29.29	948.492	948.492	2	MS2:100_acn_grad.3029.3029.2.dta
		VMDLSEYR	3	shared(3)	0	0.7775
							(00000000),				29.78	31.41	1011.47	1011.47	1	MS2:100_acn_grad.2812.2812.1.dta
		LREQVEER	8	shared(3)	1	0.8484
							(00000000),				33.52	28.68	1057.55	1057.55	2	MS2:50__Salt_Recal.1709.1709.2.dta
		NLYDYLVAK	5	shared(2)	0	0.8846
							(000000000),				36.32	29.09	1097.58	1097.58	1	MS2:100_acn_grad.4893.4893.1.dta
		VMDLSEYRK	8	shared(2)	1	0.9605
							(000000000),				48.98	30.98	1139.56	1139.56	2	MS2:50__Salt.3454.3454.2.dta
		SKFSLGVSDPK	4	shared(3)	1	0.9803
							(00000000000),				55.56	28.63	1163.62	1163.62	2	MS2:40__Salt.3441.3441.2.dta
		AQLGLGHSYSR	32	shared(3)	0	0.9996
							(00000000000),				83.47	30.6	1187.6	1187.61	2	MS2:100__Salt.3228.3228.2.dta
							(00000000000),				28.82	30.43	1187.61	1187.61	1	MS2:100__Salt.2892.2892.1.dta
		IVNDNYLYAK	2	shared(2)	0	0.9761
							(0000000000),				30.47	29.74	1211.62	1211.62	2	MS2:100_acn_grad.2460.2460.2.dta
							(0000000000),				34.91	29.31	1211.62	1211.62	1	MS2:100_acn_grad.2513.2513.1.dta
		KNLYDYLVAK	35	shared(2)	1	0.998
							(0000000000),				53.27	26.18	1225.67	1225.67	2	MS2:100_acn_grad.3493.3493.2.dta
							(0000000000),				42.58	26.44	1225.67	1225.67	3	MS2:80__Salt.6779.6779.3.dta
		LDFYDKGVAPR	33	shared(3)	1	1
							(00000000000),				61.73	30.57	1279.66	1279.66	3	MS2:70__Salt.4585.4585.3.dta
							(00000000000),				92.18	30.58	1279.66	1279.66	2	MS2:50__Salt.4268.4268.2.dta
							(00000000000),				39.29	30.44	1279.66	1279.66	1	MS2:70__Salt.4596.4596.1.dta
		LISHAGSLTNLAK	153	shared(3)	0	1
							(0000000000000),				48.6	24.74	1323.75	1323.75	3	MS2:100__Salt.3784.3784.3.dta
							(0000000000000),				77.27	24.65	1323.75	1323.75	1	MS2:90__Salt_two.3830.3830.1.dta
							(0000000000000),				73.05	25.29	1323.75	1323.75	2	MS2:100__Salt.4073.4073.2.dta
		FHFDTFVGDLK	76	shared(2)	0	1
							(00000000000),				70.96	30.98	1324.64	1324.64	2	MS2:60__Salt_Recal.7377.7377.2.dta
							(00000000000),				49.02	30.88	1324.65	1324.64	3	MS2:70__Salt_Recal.7415.7415.3.dta
							(00000000000),				79.54	31.1	1324.65	1324.64	1	MS2:70__Salt.8201.8201.1.dta
		CPSSTLQILGAEK	2	shared(3)	0	0.9993
							(0000000000000),				93.65	30.14	1402.71	1402.71	2	MS2:100_acn_grad.3724.3724.2.dta
		SFNPFTSALDALK	24	shared(3)	0	1
							(0000000000000),				92.83	30.07	1409.72	1409.72	2	MS2:100_acn_grad_Recal.7039.7039.2.dta
							(0000000000000),				52.45	29.99	1409.72	1409.72	1	MS2:100_acn_grad.6498.6498.1.dta
		IPALTDIVGDEDKAK	1	distinct	1	0.727
							(000000000000000),				26.3	28.5	1583.84	1583.84	3	MS2:40__Salt.6453.6453.3.dta
		EWYSWHFPELVK	33	shared(3)	0	0.997
							(000000000000),				64.23	30.73	1619.76	1619.78	2	MS2:100__Salt_Recal.9207.9207.2.dta
							(000000000000),				26.26	30.8	1620.78	1619.78	3	MS2:100__Salt.12063.12063.3.dta
		IPCQSNEFVSELLR	25	shared(2)	0	0.9999
							(00000000000000),				122.01	30.4	1690.84	1690.84	2	MS2:100_acn_grad.5192.5192.2.dta
		QCNAVSEGILTDELR	9	shared(3)	0	0.998
							(000000000000000),				88.43	31.18	1703.81	1703.82	2	MS2:100_acn_grad.3764.3764.2.dta
		KNIDVMQAAIESAENK	4	shared(2)	1	1
							(0000000000000000),				125.91	30.29	1759.88	1759.88	2	MS2:100_acn_grad.3661.3661.2.dta
		MNDIAPNLASLIGEVVGAR	22	shared(2)	0	1
							(0000000000000000000),				42.77	27.86	1939.02	1939.02	3	MS2:30__Salt.13605.13605.3.dta
							(0000000000000000000),				114.58	27.65	1939.02	1939.02	2	MS2:100_acn_grad.8644.8644.2.dta
		LAEDKIPALTDIVGDEDK	4	distinct	1	1
							(000000000000000000),				38.45	29.31	1940.99	1940.99	3	MS2:40__Salt_Recal.7035.7035.3.dta
							(000000000000000000),				119.56	28.97	1941	1940.99	2	MS2:100_acn_grad.4561.4561.2.dta
		VDNMVIQAIFLLDTLDK	24	shared(3)	0	1
							(00000000000000000),				81.9	27.26	1948.05	1947.04	2	MS2:30__Salt.14990.14990.2.dta
							(00000000000000000),				81.96	27.16	1947.04	1947.04	3	MS2:10__Salt.16391.16391.3.dta
		ASMGQDLSPVDLINVHQFAQR	100	shared(2)	0	1
							(000000000000000000000),				86.2	30.07	2325.15	2325.15	2	MS2:100__Salt.9346.9346.2.dta
							(000000000000000000000),				83.79	30.06	2325.16	2325.15	3	MS2:70__Salt.9762.9762.3.dta
		AADAEDDVAIDTNGDAVEDHKSER	4	distinct	1	0.9981
							(000000000000000000000000),				80.32	31.76	2542.11	2542.11	3	MS2:50__Salt.3586.3586.3.dta
		IGSQISEVTKIPCQSNEFVSELLR	73	shared(2)	1	1
							(000000000000000000000000),				92.65	27.67	2733.4	2733.4	3	MS2:90__Salt_two.11109.11109.3.dta
							(000000000000000000000000),				40	27.75	2733.4	2733.4	2	MS2:90__Salt_one.10906.10906.2.dta
		SFNPFTSALDALKQCNAVSEGILTDELR	13	shared(3)	1	0.9936
							(0000000000000000000000000000),				75.64	29.44	3095.53	3095.52	3	MS2:100__Salt.14623.14623.3.dta
		NIDVMQAAIESAENKDTEMETEAPAEVSGK	10	shared(2)	1	0.9556
							(000000000000000000000000000000),				41.53	31.08	3206.47	3206.46	3	MS2:100_acn_grad_Recal.5604.5604.3.dta
																	Glyma17g13770.1	61368.7	NUCLEOLAR PROTEIN NOP56
19	1
		HFGEIQR	5	distinct	0	0.9813
							(0000000),				38.46	27.72	885.446	885.446	2	MS2:100__Salt.2759.2759.2.dta
							(0000000),				31.3	27.72	885.446	885.446	1	MS2:90__Salt_one.2665.2665.1.dta
		VHFADTFK	2	shared(2)	0	0.922
							(00000000),				41.41	29.98	963.481	963.481	1	MS2:60__Salt.3703.3703.1.dta
		HLLSPALEK	8	shared(2)	0	0.9902
							(000000000),				36.2	25.91	1006.58	1006.58	1	MS2:100__Salt.3782.3782.1.dta
							(000000000),				38.37	25.71	1006.58	1006.58	2	MS2:80__Salt.3509.3509.2.dta
		ILDDAEAKR	2	distinct	1	0.9818
							(000000000),				57.49	29.42	1029.55	1029.55	2	MS2:40__Salt.2222.2222.2.dta
		FFLSLYGHK	2	shared(2)	0	0.7324
							(000000000),				26.81	29.41	1110.59	1110.59	2	MS2:100__Salt.7049.7049.2.dta
		TLAIDLQGHR	10	distinct	0	0.971
							(0000000000),				51.53	28.54	1122.61	1122.62	2	MS2:90__Salt_one.4084.4084.2.dta
		DRVATVQFNK	1	distinct	1	0.8974
							(0000000000),				37.41	29.75	1176.62	1176.62	2	MS2:70__Salt.3324.3324.2.dta
		GDFIVTGSHDR	1	shared(2)	0	0.7328
							(00000000000),				26.33	30.77	1203.57	1202.57	2	MS2:80__Salt.3115.3115.2.dta
		IWNPSTGSCLR	2	distinct	0	0.8948
							(00000000000),				36.95	30.74	1289.62	1289.62	2	MS2:30__Salt.4089.4089.2.dta
		YIAVALLDSTVK	1	shared(2)	0	0.8746
							(000000000000),				33.23	25.07	1291.73	1291.74	2	MS2:20__Salt.7446.7446.2.dta
		IWGLDFGDCHK	5	shared(2)	0	0.9932
							(00000000000),				46.6	30.65	1347.6	1346.61	2	MS2:50__Salt_Recal.6462.6462.2.dta
							(00000000000),				35.16	30.76	1346.61	1346.61	3	MS2:70__Salt.7798.7798.3.dta
		DQVTDVVFLSSGK	1	distinct	0	0.9259
							(0000000000000),				40.2	31.01	1393.71	1393.71	2	MS2:10__Salt.6141.6141.2.dta
		ICSISFCPITPK	1	distinct	0	0.9397
							(000000000000),				42.76	30.13	1421.71	1421.7	2	MS2:20__Salt.6085.6085.2.dta
		DQVTDVVFLSSGKK	2	distinct	1	0.9862
							(00000000000000),				58.44	28.92	1522.81	1521.8	2	MS2:50__Salt.6163.6163.2.dta
		DWTSYSDKVELVCR	2	shared(2)	1	0.826
							(00000000000000),				30.1	31.17	1756.81	1756.81	2	MS2:70__Salt.6392.6392.2.dta
		TIDSGYGLCSLILPTNK	4	distinct	0	0.9904
							(00000000000000000),				61.52	29.44	1850.95	1850.94	2	MS2:100_acn_grad.5807.5807.2.dta
		YALKEEIPEEGAVALAGK	14	distinct	1	0.9991
							(000000000000000000),				58.62	27.47	1887	1887	2	MS2:60__Salt.6716.6716.2.dta
							(000000000000000000),				38.84	27.47	1887	1887	3	MS2:70__Salt.6415.6415.3.dta
		DNDVILWDVVGETGLFR	8	shared(2)	0	0.9998
							(00000000000000000),				103.72	30.26	1946.98	1946.97	2	MS2:100_acn_grad_Recal.8016.8016.2.dta
		IWDSDKGTCETTLNGHK	4	shared(2)	1	0.9998
							(00000000000000000),				60.59	31.3	1960.89	1960.89	3	MS2:70__Salt.3254.3254.3.dta
							(00000000000000000),				58.48	31.6	1961.88	1960.89	2	MS2:70__Salt.3498.3498.2.dta
		GPSLAVNSIASSPSSLIASGYGDGSIR	2	distinct	0	0.9388
							(000000000000000000000000000),				36.19	28.75	2562.3	2562.29	2	MS2:10__Salt.7133.7133.2.dta
		FYSIKHESADGESVNGGEESSIQNK	3	distinct	1	0.9994
							(0000000000000000000000000),				93.32	31.39	2711.23	2711.23	3	MS2:80__Salt.3640.3640.3.dta
		TGSLLASGSKDNDVILWDVVGETGLFR	5	distinct	1	0.9428
							(000000000000000000000000000),				38.95	27.13	2849.47	2848.46	3	MS2:100__Salt.13376.13376.3.dta
		NSLGSLALSLNNNLLEFYSIEQGETKK	12	distinct	1	0.9571
							(000000000000000000000000000),				42.25	27.28	2982.54	2981.53	3	MS2:100__Salt.13636.13636.3.dta
																	Glyma03g34360.1	96530.2	FAMILY NOT NAMED
20	1
		EMQELPAKR	1	distinct	1	0.7782
							(000000000),				30.48	29.38	1100.56	1100.57	2	MS2:50__Salt.2459.2459.2.dta
		AVLLSGTPGIGK	2	shared(2)	0	0.7662
							(000000000000),				25.71	23.28	1111.66	1111.66	2	MS2:10__Salt.4218.4218.2.dta
		MEYLTLLLK	3	shared(2)	0	0.8919
							(000000000),				36.44	26.36	1122.64	1122.64	2	MS2:10__Salt.9697.9697.2.dta
		VADLITLPGVK	2	shared(2)	0	0.938
							(00000000000),				40.87	21.67	1124.68	1124.68	2	MS2:10__Salt.5656.5656.2.dta
		TVAGGQESSGRR	1	distinct	1	0.7967
							(000000000000),				28.86	29.98	1204.61	1203.6	2	MS2:30__Salt.4743.4743.2.dta
		AVAVASQSKVSPK	2	shared(2)	1	0.9982
							(0000000100000),	(0000000100000).			28.24	30.63	1350.69	1350.69	2	MS2:50__Salt.2390.2390.2.dta
							(0000000000100),	(0000000000100).			41.59	30.63	1350.69	1350.69	2	MS2:50__Salt.2390.2390.2.dta
							(0000000000300),:		(0000000000100),	(0000000000100).	71.66 - 92.31	44.3	1253.077: 1350.689	1252.714: 1350.691	2	MS3:50__Salt.2391.2391.2.dta MS2:50__Salt.2390.2390.2.dta
							(0000030000000),:		(0000010000000),	(0000010000000).	48.65 - 60.10	44.3	1253.077: 1350.689	1252.714: 1350.691	2	MS3:50__Salt.2391.2391.2.dta MS2:50__Salt.2390.2390.2.dta
							(0000000300000),:		(0000000100000),	(0000000100000).	41.82 - 55.84	44.3	1253.077: 1350.689	1252.714: 1350.691	2	MS3:50__Salt.2391.2391.2.dta MS2:50__Salt.2390.2390.2.dta
		IPIICICNDR	11	shared(2)	0	0.9849
							(0000000000),				59.32	30.15	1272.63	1272.63	2	MS2:10__Salt.5445.5445.2.dta
		DEDISPFTAVDK	2	shared(2)	0	0.8562
							(000000000000),				33.05	31.02	1335.62	1335.62	2	MS2:100_acn_grad.2100.2100.2.dta
		AWNEHFLDTGNK	4	shared(2)	0	0.962
							(000000000000),				48.35	31.59	1430.66	1430.66	2	MS2:70__Salt.5331.5331.2.dta
		GHPNPLDGIQPAVK	7	shared(2)	0	0.8411
							(00000000000000),				30.53	28.55	1441.76	1441.77	2	MS2:90__Salt_two.4618.4618.2.dta
		DIIGNQSLVLQLR	1	shared(2)	0	0.8876
							(0000000000000),				33.8	23.91	1467.84	1467.84	2	MS2:10__Salt.6710.6710.2.dta
		SLVNYCLLLSFR	14	shared(2)	0	0.9687
							(000000000000),				49.86	28.52	1483.79	1483.79	2	MS2:10__Salt.11090.11090.2.dta
		TNYLLCDEDIGGR	2	shared(2)	0	0.962
							(0000000000000),				47.77	30.75	1524.69	1524.69	2	MS2:100_acn_grad.4052.4052.2.dta
		AWNEHFLDTGNKK	7	shared(2)	1	0.9995
							(0000000000000),				66.52	30.98	1558.75	1558.75	2	MS2:100__Salt.4256.4256.2.dta
							(0000000000000),				42.71	31	1558.75	1558.75	3	MS2:100__Salt.4356.4356.3.dta
		LQVNEIALEELAER	13	shared(2)	0	1
							(00000000000000),				106.48	28.34	1625.86	1625.86	2	MS2:100_acn_grad.4631.4631.2.dta
							(00000000000000),				60.84	28.26	1625.86	1625.86	3	MS2:100_acn_grad.5132.5132.3.dta
		KTNYLLCDEDIGGR	9	shared(2)	1	0.9995
							(00000000000000),				77.08	31.27	1652.78	1652.78	2	MS2:50__Salt.4710.4710.2.dta
							(00000000000000),				31.8	31.27	1652.78	1652.78	3	MS2:70__Salt.5076.5076.3.dta
		SVLIMDEVDGMSAGDR	1	shared(2)	0	0.9977
							(0000000000000000),				78.39	31	1694.77	1693.77	2	MS2:100_acn_grad_Recal.4544.4544.2.dta
		QLGTSFLTEDGLFDMIR	1	distinct	0	0.9904
							(00000000000000000),				67.34	31.08	1942.94	1941.95	2	MS2:100_acn_grad.7445.7445.2.dta
		FLTNAKDEDISPFTAVDK	17	shared(2)	1	1
							(000000000000000000),				67.67	30.06	2010	2009.99	3	MS2:40__Salt.6702.6702.3.dta
							(000000000000000000),				132.95	30.2	2009.99	2009.99	2	MS2:100_acn_grad.3965.3965.2.dta
		AKQLGTSFLTEDGLFDMIR	0	distinct	1	0.854
							(0000000000000000000),				37.16	30.17	2142.07	2141.08	2	MS2:50__Salt.11720.11720.2.dta
		DEDISPFTAVDKLFGFNAGK	5	shared(2)	1	0.9983
							(00000000000000000000),				30.3	30.57	2170.06	2170.06	3	MS2:100_acn_grad.7574.7574.3.dta
							(00000000000000000000),				59.68	30.52	2170.07	2170.06	2	MS2:100_acn_grad.7581.7581.2.dta
		SVLIMDEVDGMSAGDRGGVADLIASIK	9	shared(2)	1	0.9861
							(000000000000000000000000000),				55.48	28.94	2719.36	2718.36	3	MS2:90__Salt_one.12324.12324.3.dta
																	Glyma12g10230.1	101875	CHROMOSOME TRANSMISSION FIDELITY FACTOR 18
21	1
		ADVEGFFK	2	distinct	0	0.7717
							(00000000),				29.67	32.2	911.439	911.439	2	MS2:40__Salt.5375.5375.2.dta
		DAGEVVDVR	2	shared(2)	0	0.977
							(000000000),				54.79	29.41	958.472	958.472	2	MS2:30__Salt.2743.2743.2.dta
		LPTLPVAPAK	166	distinct	0	0.9648
							(0000000000),				47.08	18.81	1005.62	1005.62	2	MS2:20__Salt.4793.4793.2.dta
		GQSQTIFVR	2	distinct	0	0.8261
							(000000000),				33.67	29.29	1034.55	1034.55	2	MS2:100_acn_grad.1536.1536.2.dta
		VAVPSKNQSAK	1	distinct	1	0.9247
							(00000000000),				40	27.42	1127.63	1127.63	2	MS2:70__Salt.1701.1701.2.dta
		FATDDTGKFK	18	shared(2)	1	0.9973
							(0000000000),				52.1	29.45	1128.55	1128.55	2	MS2:70__Salt.2987.2988.2.dta
							(0000000000),				38.29	29.7	1128.55	1128.55	1	MS2:40__Salt.2796.2796.1.dta
		VDAAPAVVPPSK	2	distinct	0	0.9721
							(000000000000),				32.81	26.37	1149.64	1149.64	2	MS2:100_acn_grad.1790.1790.2.dta
							(000000000000),				27.85	26.93	1149.64	1149.64	1	MS2:100_acn_grad.1838.1838.1.dta
		DVEMVDAALSEK	5	distinct	0	0.9985
							(000000000000),				85.14	30.87	1305.61	1305.61	2	MS2:100_acn_grad.2900.2900.2.dta
		GFDTSLGEDEIR	9	shared(2)	0	0.999
							(000000000000),				89.45	30.35	1337.61	1337.61	2	MS2:100_acn_grad.3756.3756.2.dta
		VSIPKDYESGAVK	10	shared(2)	1	0.9706
							(0000000000000),				27.18	29.71	1391.73	1391.73	2	MS2:60__Salt.3762.3762.2.dta
							(0000000000000),				35.85	29.68	1391.73	1391.73	3	MS2:60__Salt.3526.3526.3.dta
		TLFVGNLPFSVER	60	shared(2)	0	1
							(0000000000000),				75.13	28.68	1477.79	1477.79	2	MS2:20__Salt.9030.9030.2.dta
							(0000000001000),	(0000000002000).			46.47	30.89	1558.76	1557.76	2	MS2:100_acn_grad.6042.6042.2.dta
							(0000000000000),				52.72	28.49	1477.79	1477.79	1	MS2:100_acn_grad.5647.5647.1.dta
							(0000000000000),				38.63	28.83	1477.79	1477.79	3	MS2:30__Salt.9170.9170.3.dta
		GRDVEMVDAALSEK	12	distinct	1	0.9999
							(00000000000000),				47.58	30.5	1518.73	1518.73	3	MS2:60__Salt.5170.5170.3.dta
							(00000000000000),				78.57	31.06	1518.72	1518.73	2	MS2:50__Salt_Recal.3995.3995.2.dta
		SAIKVDAAPAVVPPSK	43	distinct	1	0.9998
							(0000000000000000),				80.21	22.72	1548.89	1548.89	2	MS2:70__Salt.3927.3927.2.dta
							(0000000000000000),				32.62	22.83	1548.89	1548.89	3	MS2:70__Salt.4035.4035.3.dta
		GFAYVDFGDADSMGK	15	distinct	0	0.9998
							(000000000000000),				109.12	30.27	1578.67	1578.67	2	MS2:100_acn_grad_Recal.4133.4133.2.dta
		GSLQEHFGSCGDITR	58	shared(2)	0	1
							(000000000000000),				104.27	31.34	1662.74	1662.74	2	MS2:80__Salt.3866.3866.2.dta
							(000000000000000),				73.38	31.31	1662.74	1662.74	3	MS2:60__Salt_Recal.3179.3179.3.dta
		GAYTPNSSNWNNSSQK	2	shared(2)	0	0.9728
							(0000000000000000),				50.42	31.03	1754.78	1753.77	2	MS2:100_acn_grad.1246.1246.2.dta
		ADVEGFFKDAGEVVDVR	31	distinct	1	1
							(00000000000000000),				63.67	31.05	1851.9	1851.9	3	MS2:100_acn_grad_Recal.5965.5965.3.dta
							(00000000000000000),				74.09	30.81	1851.9	1851.9	2	MS2:100_acn_grad.5357.5357.2.dta
		ERGAYTPNSSNWNNSSQK	4	shared(2)	1	0.9976
							(000000000000000000),				40.78	31.45	2038.91	2038.91	3	MS2:90__Salt_two.2851.2851.3.dta
							(000000000000000000),				47.4	31.57	2038.91	2038.91	2	MS2:90__Salt_one.2894.2894.2.dta
		ALELHETELGGYTLTVDEAKPR	28	shared(2)	0	1
							(0000000000000000000000),				81.8	29.56	2441.23	2441.24	3	MS2:80__Salt_Recal.6734.6734.3.dta
							(0000000000000000000000),				48.68	29.01	2441.24	2441.24	4	MS2:70__Salt.7409.7409.4.dta
							(0000000000000000000000),				102.19	29.1	2441.24	2441.24	2	MS2:80__Salt.7366.7366.2.dta
		GFGHVEFATAEAAQNALGLNGQQLFNR	29	distinct	0	1
							(000000000000000000000000000),				87.13	30.08	2860.39	2859.41	3	MS2:90__Salt_two.10946.10946.3.dta
							(000000000000000000000000000),				50.24	30.19	2860.39	2859.41	2	MS2:80__Salt.10969.10969.2.dta
		GFDTSLGEDEIRGSLQEHFGSCGDITR	2	shared(2)	1	0.9633
							(000000000000000000000000000),				45.04	31.61	2982.35	2982.34	3	MS2:70__Salt.9097.9097.3.dta
																	Glyma11g10790.1	78332.3	RNA-BINDING PROTEIN
22	1
		LSKEDIEK	2	shared(2)	1	0.9261
							(00000000),				47.51	30.07	960.513	960.513	2	MS2:50__Salt.2374.2374.2.dta
		ITITNDKGR	2	shared(10)	1	0.9649
							(000000000),				50.12	30.05	1016.56	1016.56	2	MS2:80__Salt.2235.2235.2.dta
		MVQEAEKYK	4	shared(7)	1	0.9595
							(000000000),				48.83	31.5	1124.55	1124.55	2	MS2:50__Salt.2319.2319.2.dta
		DAGVIAGLNVMR	2	shared(6)	0	0.991
							(000000000000),				72.2	29.23	1214.64	1214.64	2	MS2:100_acn_grad.4735.4735.2.dta
		MVNHFVQEFK	41	shared(8)	0	1
							(0000000000),				37.06	29.77	1277.62	1277.62	3	MS2:100__Salt.5400.5400.3.dta
							(0000000000),				68.07	29.79	1277.62	1277.62	2	MS2:90__Salt_two.5075.5075.2.dta
							(0000000000),				56.86	29.86	1277.62	1277.62	1	MS2:90__Salt_one.4685.4685.1.dta
		EIAEAYLGSTVK	1	shared(5)	0	0.9891
							(000000000000),				68.73	30.43	1279.66	1279.67	2	MS2:100_acn_grad.3530.3530.2.dta
		SVDDVVLVGGSTR	6	shared(2)	0	0.9988
							(0000000000000),				52.36	30.03	1302.68	1302.68	2	MS2:30__Salt.4315.4315.2.dta
							(0000000000000),				45.28	29.98	1302.68	1302.68	1	MS2:100_acn_grad.3345.3345.1.dta
		FEELNMDLFR	8	shared(9)	0	0.9904
							(0000000000),				64.73	31.04	1312.61	1312.61	2	MS2:100_acn_grad.4905.4905.2.dta
		NALENYAYNMR	1	shared(6)	0	0.9834
							(00000000000),				57.99	30.61	1357.61	1357.61	2	MS2:100_acn_grad.3775.3775.2.dta
		RFSDSSVQSDIK	4	shared(2)	1	0.909
							(000000000000),				38.31	31.21	1367.66	1367.67	2	MS2:50__Salt_Recal.2510.2510.2.dta
		VQQLLQDFFNGK	4	shared(9)	0	0.9917
							(000000000000),				65.45	30.43	1435.74	1435.75	2	MS2:10__Salt.8491.8491.2.dta
		FEELNMDLFRK	23	shared(8)	1	0.9986
							(00000000000),				39.17	30.68	1440.71	1440.71	3	MS2:70__Salt.8177.8177.3.dta
							(00000000000),				63.57	30.78	1440.7	1440.71	2	MS2:50__Salt_Recal.6961.6961.2.dta
		TTPSYVGFTDTER	4	shared(3)	0	0.987
							(0000000000000),				62.22	31.72	1472.68	1472.68	2	MS2:100_acn_grad.3289.3289.2.dta
		ARFEELNMDLFR	38	shared(8)	1	0.9993
							(000000000000),				43.41	30.53	1539.75	1539.75	3	MS2:70__Salt_Recal.8250.8250.3.dta
							(000000000000),				63.75	31.16	1539.74	1539.75	2	MS2:70__Salt_Recal.7799.7799.2.dta
		QFAAEEISSMVLIK	13	shared(2)	0	0.9892
							(00000000000000),				61.44	29.8	1564.82	1564.82	2	MS2:10__Salt.7887.7887.2.dta
		MKELESICNPIIAK	16	shared(5)	1	0.9998
							(00000000000000),				74.91	29.45	1644.85	1644.86	2	MS2:50__Salt_Recal.4827.4827.2.dta
							(00000000000000),				44.7	29.13	1644.86	1644.86	3	MS2:60__Salt.5903.5903.3.dta
		IINEPTAAAIAYGLDK	7	shared(14)	0	0.9964
							(0000000000000000),				72.62	27.97	1658.89	1658.89	2	MS2:10__Salt.5721.5721.2.dta
		NQVAMNPINTVFDAK	6	shared(5)	0	0.9999
							(000000000000000),				112.38	30.41	1660.83	1660.82	2	MS2:10__Salt.6025.6025.2.dta
		ATAGDTHLGGEDFDNR	30	shared(9)	0	1
							(0000000000000000),				82.88	30.66	1674.72	1674.72	2	MS2:50__Salt.3337.3337.2.dta
							(0000000000000000),				52.01	30.77	1674.72	1674.72	3	MS2:40__Salt_Recal.2673.2673.3.dta
		NAVVTVPAYFNDSQR	5	shared(10)	0	0.9892
							(000000000000000),				61.36	30.93	1679.83	1679.83	2	MS2:100_acn_grad.4328.4328.2.dta
		VIAGAADKPMIVVNYK	27	distinct	0	0.9999
							(0000000000000000),				86.27	26.32	1687.93	1687.93	2	MS2:80__Salt.5520.5520.2.dta
							(0000000000000000),				38.94	26.29	1687.93	1687.93	3	MS2:60__Salt.5424.5424.3.dta
		IINEPTAAAIAYGLDKK	76	shared(11)	1	1
							(00000000000000000),				51.74	25.44	1786.98	1786.98	3	MS2:90__Salt_one.6875.6875.3.dta
							(00000000000000000),				98.93	25.42	1786.98	1786.98	2	MS2:90__Salt_two.6826.6826.2.dta
		NQVAMNPINTVFDAKR	9	shared(5)	1	0.9971
							(0000000000000000),				59.16	30.12	1816.92	1816.92	2	MS2:90__Salt_two.7065.7065.2.dta
							(0000000000000000),				27.89	30.12	1816.93	1816.92	3	MS2:90__Salt_one.7409.7409.3.dta
		VQQLLQDFFNGKELCK	17	shared(7)	1	0.9987
							(0000000000000000),				59.44	30.25	1966.98	1966	3	MS2:90__Salt_one.9443.9443.3.dta
							(0000000000000000),				37.38	30.35	1966.98	1966	2	MS2:70__Salt.9451.9451.2.dta
		VIAGAADKPMIVVNYKGEEK	13	distinct	1	1
							(00000000000000000000),				81.92	27.08	2131.14	2131.14	3	MS2:90__Salt_one.4785.4785.3.dta
							(00000000000000000000),				33.79	27.09	2131.13	2131.14	4	MS2:90__Salt_one.4834.4834.4.dta
							(00000000000000000000),				67.54	27	2131.14	2131.14	2	MS2:90__Salt_one.4802.4802.2.dta
		LIGDAAKNQVAMNPINTVFDAK	2	shared(5)	1	0.913
							(0000000000000000000000),				36.51	28.54	2330.2	2329.21	3	MS2:40__Salt.8613.8613.3.dta
		SINPDEAVAYGAAVQAAILSGEGNEK	12	shared(7)	0	1
							(00000000000000000000000000),				53.07	29.79	2573.26	2573.26	3	MS2:100_acn_grad.6618.6618.3.dta
							(00000000000000000000000000),				131.45	29.61	2573.27	2573.26	2	MS2:100_acn_grad.6594.6594.2.dta
		EQVFSTYSDNQPGVLIQVFEGER	12	shared(2)	0	1
							(00000000000000000000000),				79.48	30.45	2641.27	2641.27	2	MS2:100_acn_grad.6619.6619.2.dta
							(00000000000000000000000),				55.05	30.43	2641.27	2641.27	3	MS2:10__Salt.9405.9405.3.dta
		MYQGGAGPDMGGAGAGAAEDDYAAPSGGSGAGPK	1	distinct	0	0.848
							(0000000000000000000000000000000000),				25.77	30.57	2997.25	2997.25	3	MS2:10__Salt.2958.2958.3.dta
		MYQGGAGPDMGGAGAGAAEDDYAAPSGGSGAGPKIEEVD	2	distinct	1	0.9846
							(000000000000000000000000000000000000000),				50.02	31.25	3582.51	3582.51	3	MS2:10__Salt.4221.4221.3.dta
																	Glyma19g35560.1	71854.4	HEAT SHOCK PROTEIN 70KDA
23	1
		ETIQQLLR	0	distinct	0	0.7853
							(00000000),				32.94	27.47	999.572	999.571	2	MS2:100_acn_grad.496.496.2.dta
		RLTMLEDR	2	distinct	1	0.8789
							(00000000),				36.4	30.04	1032.54	1032.54	2	MS2:70__Salt.3466.3466.2.dta
		FDLDTPIER	2	distinct	0	0.9427
							(000000000),				44.47	29.76	1104.55	1104.55	2	MS2:100_acn_grad.3301.3301.2.dta
		MVGLVQLLLK	4	distinct	0	0.8822
							(0000000000),				33.85	21.21	1112.7	1112.7	2	MS2:50__Salt.10564.10564.2.dta
		FFLSQLQSR	8	distinct	0	0.9323
							(000000000),				42.28	28.51	1125.6	1124.6	2	MS2:40__Salt.6253.6253.2.dta
		LIDLASFHDK	4	distinct	0	0.9835
							(0000000000),				37.51	29.21	1157.61	1157.61	2	MS2:50__Salt_Recal.4644.4644.2.dta
							(0000000000),				31.91	28.97	1157.61	1157.61	1	MS2:50__Salt.5516.5516.1.dta
		IDKEQAELAR	3	distinct	1	0.9819
							(0000000000),				57.11	29.4	1171.62	1171.62	2	MS2:40__Salt.2392.2393.2.dta
		HLDTIGIAPLPK	12	distinct	0	1
							(000000000000),				43.09	24.5	1273.74	1273.74	3	MS2:90__Salt_two.5562.5562.3.dta
							(000000000000),				47.7	24.9	1273.73	1273.74	2	MS2:80__Salt_Recal.4667.4667.2.dta
							(000000000000),				58.51	24.28	1273.74	1273.74	1	MS2:90__Salt_two.5553.5553.1.dta
		LLAVELHAGDVR	6	distinct	0	0.998
							(000000000000),				52.46	26.65	1291.72	1291.72	2	MS2:60__Salt.5111.5111.2.dta
							(000000000000),				40.77	26.27	1291.73	1291.72	3	MS2:70__Salt.5199.5199.3.dta
		GHQSLFDQVLR	3	distinct	0	0.996
							(00000000000),				50.24	29.23	1298.67	1298.67	2	MS2:80__Salt.6353.6353.2.dta
							(00000000000),				38.36	29.05	1298.67	1298.67	3	MS2:80__Salt.6378.6378.3.dta
		VLELLEIIQFR	39	distinct	0	0.9967
							(00000000000),				31.74	21.67	1371.81	1371.81	3	MS2:70__Salt.12711.12711.3.dta
							(00000000000),				54.3	22.01	1371.81	1371.81	2	MS2:40__Salt.12282.12282.2.dta
		ACTFEAELALLLR	4	distinct	0	0.9713
							(0000000000000),				50.52	28.9	1505.79	1505.79	2	MS2:10__Salt.12703.12703.2.dta
		YDLPAEDILGNPGNSGK	1	distinct	0	0.9363
							(00000000000000000),				40.36	31.23	1758.84	1758.84	2	MS2:100_acn_grad.4403.4403.2.dta
		TISLYVLDALINIDHER	3	distinct	0	0.9549
							(00000000000000000),				43.2	26.51	1984.07	1984.06	2	MS2:60__Salt.13234.13234.2.dta
		LDIAEADELRTEQVNLVVGILSK	2	distinct	1	0.8767
							(00000000000000000000000),				30.88	23.16	2524.38	2524.38	3	MS2:60__Salt.12934.12934.3.dta
																	Glyma06g29570.1	94402.2	unknown
24	1
		AFDTDFVK	2	distinct	0	0.8781
							(00000000),				36.39	30.33	941.449	941.449	1	MS2:100_acn_grad.3475.3475.1.dta
		GFEVIDAIK	1	shared(2)	0	0.954
							(000000000),				46.58	28.06	990.539	990.539	1	MS2:100_acn_grad.3877.3877.1.dta
		FRDQGLSAR	3	distinct	1	0.9103
							(000000000),				40.76	30.04	1048.54	1048.54	2	MS2:100__Salt.2647.2647.2.dta
		DMVALSGAHTFGK	29	shared(2)	0	0.9989
							(0000000000000),				68.55	30.94	1332.64	1332.65	2	MS2:40__Salt_Recal.3996.3996.2.dta
							(0000000000000),				32.44	30.66	1332.65	1332.65	3	MS2:80__Salt.4867.4867.3.dta
		TPNHFDNNYFK	14	shared(2)	0	0.9944
							(00000000000),				39.1	30.27	1395.62	1395.62	2	MS2:100__Salt.4193.4193.2.dta
							(00000000000),				44.8	30.51	1395.62	1395.62	3	MS2:80__Salt.4003.4003.3.dta
		GFEVIDAIKSEVEK	4	distinct	1	0.9995
							(00000000000000),				83.1	29.66	1562.82	1562.82	2	MS2:80__Salt.9048.9048.2.dta
							(00000000000000),				26.02	29.66	1562.82	1562.82	3	MS2:80__Salt.9056.9056.3.dta
		MGDIKPLTGSQGEIR	24	shared(2)	0	0.9999
							(000000000000000),				54.83	30.02	1600.83	1600.82	3	MS2:60__Salt.4174.4174.3.dta
							(000000000000000),				75.95	29.83	1600.83	1600.82	2	MS2:60__Salt.4178.4178.2.dta
		MGDIKPLTGSQGEIRK	1	shared(2)	1	0.9853
							(0000000000000000),				59.06	27.75	1728.92	1728.92	3	MS2:90__Salt_two.3554.3554.3.dta
		ICPGVVSCADILDIASR	12	shared(2)	0	1
							(00000000000000000),				105.22	30.49	1844.91	1844.91	2	MS2:10__Salt.8328.8329.2.dta
							(00000000000000000),				52.89	30.48	1844.91	1844.91	3	MS2:100_acn_grad.5216.5216.3.dta
		GLLNSDQVLFNGGSTDSLVR	6	shared(2)	0	0.9987
							(00000000000000000000),				83.44	29.97	2091.06	2091.06	2	MS2:100_acn_grad.5253.5253.2.dta
		RGLLNSDQVLFNGGSTDSLVR	5	shared(2)	1	0.9872
							(000000000000000000000),				58.94	29.21	2248.14	2247.16	3	MS2:50__Salt.8420.8420.3.dta
		LFFHDCFVQGCDGSILLDDTPTFQGEK	14	shared(2)	0	0.9948
							(000000000000000000000000000),				67.4	32.04	3145.42	3145.42	3	MS2:100__Salt.10758.10758.3.dta
																	Glyma18g06210.1	36395.6	unknown
25	1
		AIAGIITER	2	distinct	0	0.9691
							(000000000),				51.42	29.38	942.552	942.55	2	MS2:100_acn_grad.2660.2660.2.dta
		GMVGMVSIGDVVR	1	distinct	0	0.9816
							(0000000000000),				55.82	29.97	1318.67	1318.67	2	MS2:10__Salt.6118.6118.2.dta
		VLQAMQLMTDKR	12	distinct	1	0.9993
							(000000000000),				57.59	29.49	1432.75	1432.75	2	MS2:60__Salt.5572.5572.2.dta
							(000000000000),				48.06	29.58	1432.75	1432.75	3	MS2:70__Salt.5626.5626.3.dta
		IEEHGFESTTISDILNDK	1	distinct	0	0.9892
							(000000000000000000),				60.13	30.82	2046.98	2046.97	2	MS2:100_acn_grad.4891.4891.2.dta
		VGDIMTEENKLITVTPDTK	6	distinct	1	0.9998
							(0000000000000000000),				36.49	29.1	2104.08	2103.08	3	MS2:60__Salt.7078.7078.3.dta
							(0000000000000000000),				79.92	28.85	2103.08	2103.08	2	MS2:50__Salt.7046.7046.2.dta
		IEEHGFESTTISDILNDKGK	7	distinct	1	0.9998
							(00000000000000000000),				47.67	30.72	2233.08	2232.09	3	MS2:60__Salt_Recal.6926.6926.3.dta
							(00000000000000000000),				27.59	30.75	2232.09	2232.09	4	MS2:90__Salt_two.7828.7828.4.dta
							(00000000000000000000),				47.28	30.71	2232.09	2232.09	2	MS2:60__Salt.7685.7685.2.dta
		GADGSWLWCTTDDTVYDAVK	5	distinct	0	0.9877
							(00000000000000000000),				57.94	31.45	2258.99	2258.98	2	MS2:100_acn_grad.5286.5286.2.dta
																	Glyma14g38840.1	22784.8	INOSINE-5-MONOPHOSPHATE DEHYDROGENASE RELATED
																	Glyma14g38840.2	22784.8	unknown
26	1
		HANIVAAR	7	distinct	0	0.9976
							(00000000),				41.13	27.14	850.476	850.477	2	MS2:60__Salt.2028.2028.2.dta
							(00000000),				50.93	27.7	850.478	850.477	1	MS2:90__Salt_two.2120.2120.1.dta
		IDDIVTVR	0	distinct	0	0.653
							(00000000),				25.91	30.06	930.518	929.518	2	MS2:100_acn_grad.2507.2507.2.dta
		SLHDALCVVR	5	distinct	0	0.9851
							(0000000000),				59.18	28.8	1169.61	1168.6	2	MS2:70__Salt.4340.4340.2.dta
		VLHGMEGYCVR	2	distinct	0	0.9753
							(00000000000),				30.25	30.33	1319.61	1319.61	3	MS2:90__Salt_one.3795.3795.3.dta
							(00000000000),				36.67	30.25	1319.61	1319.61	2	MS2:100__Salt.3971.3971.2.dta
		KLGGTVDDTELVK	2	distinct	1	0.9936
							(0000000000000),				67.63	28.89	1373.74	1373.74	2	MS2:40__Salt.3590.3590.2.dta
		DAVTDLSLHYLAK	8	distinct	0	0.9609
							(0000000000000),				47.15	29.56	1444.76	1444.76	2	MS2:100_acn_grad.4142.4142.2.dta
		DVERDEIEFITK	1	distinct	1	0.8989
							(000000000000),				37.04	30.9	1492.74	1492.74	2	MS2:100_acn_grad.3540.3540.2.dta
		FLIAGGGAPEIELSR	4	distinct	0	0.9973
							(000000000000000),				76.65	28.16	1528.83	1528.83	2	MS2:10__Salt.7697.7697.2.dta
		TLNCLPIANIEHFR	3	distinct	0	0.9345
							(00000000000000),				40.7	28.83	1696.87	1696.87	2	MS2:100__Salt.8208.8208.2.dta
		LGYADLVEEFSLGDGK	1	distinct	0	0.9991
							(0000000000000000),				88.82	30.91	1711.83	1711.83	2	MS2:100_acn_grad.6545.6545.2.dta
		AVDVLTAMAVPVELSDRDSLVK	13	distinct	1	0.999
							(0000000000000000000000),				38.32	26.31	2327.24	2327.24	3	MS2:90__Salt_one.10921.10921.3.dta
							(0000000000000000000000),				54.93	26.33	2327.24	2327.24	2	MS2:100_acn_grad.6224.6224.2.dta
		AFAEALEVIPYTLAENAGLNPIAIVTELR	3	distinct	0	0.9592
							(00000000000000000000000000000),				22.6	22.76	3098.66	3097.67	3	MS2:100_acn_grad.11481.11481.3.dta
							(00000000000000000000000000000),				20.46	22.53	3098.67	3097.67	4	MS2:30__Salt.15453.15453.4.dta
																	Glyma08g05470.1	57991	CHAPERONIN
27	1
		IGINSVQR	2	shared(3)	0	0.976
							(00000000),				54.93	30.29	886.506	885.503	2	MS2:10__Salt.2435.2435.2.dta
		NLEDLWK	4	shared(2)	0	0.9569
							(0000000),				32.68	29.53	916.466	916.465	2	MS2:40__Salt.6452.6452.2.dta
							(0000000),				28.49	29.89	916.466	916.465	1	MS2:100_acn_grad_Recal.2607.2607.1.dta
		EAEEIVPMK	1	distinct	0	0.7174
							(000000000),				26.25	29.68	1044.52	1044.52	2	MS2:100_acn_grad.1775.1775.2.dta
		SQIFILSCTQR	3	shared(3)	0	0.9569
							(00000000000),				47.04	30.37	1351.69	1351.69	2	MS2:40__Salt.5944.5944.2.dta
		MDWVPYIPLEGR	2	distinct	0	0.9277
							(000000000000),				40.77	30.52	1474.73	1474.73	2	MS2:10__Salt.9540.9540.2.dta
		HVAAEDNKTEAQPR	4	distinct	1	0.9848
							(00000000000000),				57.89	31.1	1564.76	1564.76	2	MS2:90__Salt_one.1811.1811.2.dta
		FYPVQSPDAPDVSNVK	10	shared(2)	0	0.9996
							(0000000000000000),				98.53	30.87	1761.86	1761.86	2	MS2:100_acn_grad.3734.3734.2.dta
		VYLFGCTEPQLVMFK	4	shared(2)	0	0.9884
							(000000000000000),				60.35	30.4	1830.91	1830.9	2	MS2:10__Salt.10194.10195.2.dta
		TSKPQSEPEYFEDKR	7	shared(2)	1	0.9997
							(000000000000000),				57.94	31.26	1839.86	1839.86	3	MS2:70__Salt.2936.2936.3.dta
							(000000000000000),				56.76	31.18	1839.86	1839.86	2	MS2:70__Salt.2923.2924.2.dta
		VVLIPAVVAVVSPFPPSDK	10	distinct	0	0.9984
							(0000000000000000000),				60.89	17.99	1933.13	1933.13	3	MS2:30__Salt.11487.11487.3.dta
							(0000000000000000000),				24.78	17.56	1933.13	1933.13	2	MS2:20__Salt.11254.11254.2.dta
		AIEEMSEETKAAFESMR	1	shared(2)	1	0.9749
							(00000000000000000),				51.03	31.45	1957.88	1957.88	2	MS2:70__Salt.7573.7573.2.dta
		WDFSNLENAFEEDGVLYGK	8	distinct	0	0.9998
							(0000000000000000000),				115.15	31.6	2232	2232	2	MS2:100_acn_grad.7076.7076.2.dta
		ETFPVGTEWDQLDTVYQYK	2	distinct	0	0.9959
							(0000000000000000000),				70.84	31.58	2318.08	2318.07	2	MS2:100_acn_grad_Recal.6218.6218.2.dta
		WDFSNLENAFEEDGVLYGKK	13	distinct	1	0.9993
							(00000000000000000000),				70.43	31.33	2360.1	2360.1	3	MS2:40__Salt.12200.12200.3.dta
							(00000000000000000000),				38.89	31.32	2361.1	2360.1	2	MS2:40__Salt.11818.11818.2.dta
		VVLIPAVVAVVSPFPPSDKIGINSVQR	5	distinct	1	0.8563
							(000000000000000000000000000),				25.83	15.91	2801.62	2800.62	3	MS2:80__Salt.11717.11717.3.dta
																	Glyma08g14940.1	40148.2	unknown
28	1
		GAGGLITPAK	1	shared(2)	0	0.7557
							(0000000000),				26.84	26.82	884.508	883.513	2	MS2:100_acn_grad.849.849.2.dta
		VLDEGKLSK	3	shared(2)	1	0.7899
							(000000000),				29.47	28.99	987.56	987.56	2	MS2:50__Salt.2657.2657.2.dta
		IEAYDKDR	1	shared(2)	1	0.9056
							(00000000),				39.29	30.23	1008.49	1008.49	2	MS2:40__Salt.1866.1866.2.dta
		KGAGGLITPAK	12	shared(2)	1	0.9985
							(00000000000),				84.51	23.64	1011.61	1011.61	2	MS2:100__Salt.2783.2783.2.dta
		AQLYDYLK	3	shared(2)	0	0.9474
							(00000000),				45.44	28.06	1012.52	1012.52	1	MS2:100_acn_grad.3922.3922.1.dta
		LSKVEDLWK	7	shared(2)	1	0.8873
							(000000000),				36.64	29.29	1116.62	1116.62	2	MS2:40__Salt.4736.4736.2.dta
		IIQDNILYAR	4	shared(2)	0	0.9998
							(0000000000),				72.07	28.97	1217.67	1217.68	2	MS2:100_acn_grad.3748.3748.2.dta
							(0000000000),				50.81	28.8	1217.68	1217.68	1	MS2:100_acn_grad.3323.3323.1.dta
		LIAHGGSLLNLAK	54	shared(2)	0	1
							(0000000000000),				49.68	21.52	1305.78	1305.78	3	MS2:90__Salt_two.5976.5976.3.dta
							(0000000000000),				68.96	21.52	1305.78	1305.78	2	MS2:100__Salt.6010.6010.2.dta
							(0000000000000),				53.32	21.52	1305.78	1305.78	1	MS2:100__Salt.5588.5588.1.dta
		QPGSTVQILGAEK	1	shared(2)	0	0.9895
							(0000000000000),				61.71	27.63	1326.71	1326.71	2	MS2:100_acn_grad.2771.2771.2.dta
		HAEKEESPEMPSK	1	distinct	1	0.9852
							(0000000000000),				58.6	31.21	1497.68	1497.68	2	MS2:80__Salt.2238.2238.2.dta
		VHCENETLGVADSK	19	shared(2)	0	1
							(00000000000000),				108.54	31.07	1557.71	1557.71	2	MS2:50__Salt.2840.2840.2.dta
							(00000000000000),				48.08	31.03	1557.71	1557.71	3	MS2:50__Salt.2846.2846.3.dta
		EWYGWHFPELTK	18	shared(2)	0	1
							(000000000000),				34.64	30.58	1592.75	1591.75	3	MS2:90__Salt_one_Recal.14539.14539.3.dta
							(000000000000),				68.94	31.16	1591.73	1591.75	2	MS2:100__Salt_Recal.8625.8625.2.dta
							(000000000000),				52.72	31.09	1591.74	1591.75	1	MS2:100__Salt.9429.9429.1.dta
		ELCDQVLSLSEYR	3	shared(2)	0	0.9645
							(0000000000000),				48.64	31.23	1611.77	1610.76	2	MS2:100_acn_grad.4572.4572.2.dta
		MLVLFETPAGFALFK	237	shared(2)	0	1
							(000000000000000),				116.85	26.51	1682.91	1682.91	2	MS2:90__Salt_one.13483.13483.2.dta
							(000000000000000),				51.6	26.88	1682.91	1682.91	3	MS2:10__Salt.13462.13462.3.dta
		YGLIYHASLIGQAAPK	48	shared(2)	0	0.9999
							(0000000000000000),				75.97	27.15	1700.92	1700.92	2	MS2:90__Salt_one.6907.6907.2.dta
							(0000000000000000),				52.1	27.13	1700.92	1700.92	3	MS2:70__Salt.6286.6286.3.dta
		IDCIHNNAVMELMR	33	shared(2)	0	0.9994
							(00000000000000),				70.48	31.22	1714.8	1714.8	2	MS2:70__Salt.7248.7248.2.dta
							(00000000000000),				35.99	31.27	1714.79	1714.8	3	MS2:80__Salt.7439.7439.3.dta
		VDTMIVQAIGLLDDLDK	3	shared(2)	0	0.9998
							(00000000000000000),				108.07	28.51	1857.98	1857.98	2	MS2:100_acn_grad_Recal.8300.8300.2.dta
		CDALGDSQDNTMGLENR	4	distinct	0	0.9999
							(00000000000000000),				117.13	30.72	1894.78	1894.78	2	MS2:100_acn_grad.3099.3099.2.dta
		FENTSEALEAATLLIDGK	13	shared(2)	0	1
							(000000000000000000),				123.31	30.28	1920.97	1920.97	2	MS2:100_acn_grad.6767.6767.2.dta
							(000000000000000000),				38.9	30.48	1920.97	1920.97	3	MS2:100_acn_grad.6796.6796.3.dta
		LKIDCIHNNAVMELMR	2	shared(2)	1	0.9665
							(0000000000000000),				48.03	30.96	1956.96	1955.97	2	MS2:90__Salt_one.8496.8496.2.dta
		MNTIAPNLTAMVGELVGAR	26	shared(2)	0	1
							(0000000000000000000),				84.27	29.04	1957.02	1957.01	3	MS2:30__Salt.12532.12532.3.dta
							(0000000000000000000),				93.45	29.05	1957.01	1957.01	2	MS2:100_acn_grad.8140.8140.2.dta
		EASVISMGTEIGELDLANIR	6	shared(2)	0	0.9998
							(00000000000000000000),				105.1	29.37	2118.07	2117.07	2	MS2:10__Salt.11351.11351.2.dta
		VNAANLDFSEILPEEVEAELK	10	distinct	0	1
							(000000000000000000000),				121.75	30.01	2329.17	2329.17	2	MS2:100_acn_grad_Recal.7413.7413.2.dta
							(000000000000000000000),				45.05	30.15	2329.17	2329.17	3	MS2:100_acn_grad_Recal.7421.7421.3.dta
		AFSKFENTSEALEAATLLIDGK	103	shared(2)	1	1
							(0000000000000000000000),				66.98	28.6	2354.2	2354.2	3	MS2:90__Salt_one.11713.11713.3.dta
							(0000000000000000000000),				138.24	28.71	2354.2	2354.2	2	MS2:100_acn_grad.6669.6669.2.dta
		NEGDETVQADGDVGEEPEPEVVKK	1	distinct	1	0.9374
							(000000000000000000000000),				40.14	31.43	2569.17	2569.17	3	MS2:40__Salt.3589.3589.3.dta
		LMGDRVNAANLDFSEILPEEVEAELK	4	distinct	1	0.9718
							(00000000000000000000000000),				47.98	29.56	2901.45	2901.44	3	MS2:50__Salt.12465.12465.3.dta
		NQLTELISGLAVQDMAPMSLGLSHSLSR	21	shared(2)	0	0.9974
							(0000000000000000000000000000),				73.84	27.36	2967.52	2967.52	3	MS2:100__Salt.14130.14130.3.dta
		TYNPSADSVIGQMVNSAMDEDAQEPSVADK	2	distinct	0	0.9941
							(000000000000000000000000000000),				62.3	31.17	3168.38	3168.39	2	MS2:100_acn_grad.6194.6194.2.dta
		TYNPSADSVIGQMVNSAMDEDAQEPSVADKK	3	distinct	1	0.9961
							(0000000000000000000000000000000),				69.15	31.67	3296.49	3296.48	3	MS2:100_acn_grad.5686.5686.3.dta
																	Glyma12g04400.1	61637.4	NUCLEOLAR PROTEIN NOP56
29	1
		GAGGLITPAK	1	shared(2)	0	0.7557
							(0000000000),				26.84	26.82	884.508	883.513	2	MS2:100_acn_grad.849.849.2.dta
		VLDEGKLSK	3	shared(2)	1	0.7899
							(000000000),				29.47	28.99	987.56	987.56	2	MS2:50__Salt.2657.2657.2.dta
		IEAYDKDR	1	shared(2)	1	0.9056
							(00000000),				39.29	30.23	1008.49	1008.49	2	MS2:40__Salt.1866.1866.2.dta
		KGAGGLITPAK	12	shared(2)	1	0.9985
							(00000000000),				84.51	23.64	1011.61	1011.61	2	MS2:100__Salt.2783.2783.2.dta
		AQLYDYLK	3	shared(2)	0	0.9474
							(00000000),				45.44	28.06	1012.52	1012.52	1	MS2:100_acn_grad.3922.3922.1.dta
		LSKVEDLWK	7	shared(2)	1	0.8873
							(000000000),				36.64	29.29	1116.62	1116.62	2	MS2:40__Salt.4736.4736.2.dta
		IIQDNILYAR	4	shared(2)	0	0.9998
							(0000000000),				72.07	28.97	1217.67	1217.68	2	MS2:100_acn_grad.3748.3748.2.dta
							(0000000000),				50.81	28.8	1217.68	1217.68	1	MS2:100_acn_grad.3323.3323.1.dta
		LIAHGGSLLNLAK	54	shared(2)	0	1
							(0000000000000),				49.68	21.52	1305.78	1305.78	3	MS2:90__Salt_two.5976.5976.3.dta
							(0000000000000),				68.96	21.52	1305.78	1305.78	2	MS2:100__Salt.6010.6010.2.dta
							(0000000000000),				53.32	21.52	1305.78	1305.78	1	MS2:100__Salt.5588.5588.1.dta
		QPGSTVQILGAEK	1	shared(2)	0	0.9895
							(0000000000000),				61.71	27.63	1326.71	1326.71	2	MS2:100_acn_grad.2771.2771.2.dta
		VHCENETLGVADSK	19	shared(2)	0	1
							(00000000000000),				108.54	31.07	1557.71	1557.71	2	MS2:50__Salt.2840.2840.2.dta
							(00000000000000),				48.08	31.03	1557.71	1557.71	3	MS2:50__Salt.2846.2846.3.dta
		EWYGWHFPELTK	18	shared(2)	0	1
							(000000000000),				34.64	30.58	1592.75	1591.75	3	MS2:90__Salt_one_Recal.14539.14539.3.dta
							(000000000000),				68.94	31.16	1591.73	1591.75	2	MS2:100__Salt_Recal.8625.8625.2.dta
							(000000000000),				52.72	31.09	1591.74	1591.75	1	MS2:100__Salt.9429.9429.1.dta
		ELCDQVLSLSEYR	3	shared(2)	0	0.9645
							(0000000000000),				48.64	31.23	1611.77	1610.76	2	MS2:100_acn_grad.4572.4572.2.dta
		MLVLFETPAGFALFK	237	shared(2)	0	1
							(000000000000000),				116.85	26.51	1682.91	1682.91	2	MS2:90__Salt_one.13483.13483.2.dta
							(000000000000000),				51.6	26.88	1682.91	1682.91	3	MS2:10__Salt.13462.13462.3.dta
		YGLIYHASLIGQAAPK	48	shared(2)	0	0.9999
							(0000000000000000),				75.97	27.15	1700.92	1700.92	2	MS2:90__Salt_one.6907.6907.2.dta
							(0000000000000000),				52.1	27.13	1700.92	1700.92	3	MS2:70__Salt.6286.6286.3.dta
		IDCIHNNAVMELMR	33	shared(2)	0	0.9994
							(00000000000000),				70.48	31.22	1714.8	1714.8	2	MS2:70__Salt.7248.7248.2.dta
							(00000000000000),				35.99	31.27	1714.79	1714.8	3	MS2:80__Salt.7439.7439.3.dta
		VDTMIVQAIGLLDDLDK	3	shared(2)	0	0.9998
							(00000000000000000),				108.07	28.51	1857.98	1857.98	2	MS2:100_acn_grad_Recal.8300.8300.2.dta
		CDALGDGQDNTMGLENR	4	distinct	0	1
							(00000000000000000),				123.4	30.37	1864.77	1864.77	2	MS2:100_acn_grad.3091.3091.2.dta
		FENTSEALEAATLLIDGK	13	shared(2)	0	1
							(000000000000000000),				123.31	30.28	1920.97	1920.97	2	MS2:100_acn_grad.6767.6767.2.dta
							(000000000000000000),				38.9	30.48	1920.97	1920.97	3	MS2:100_acn_grad.6796.6796.3.dta
		LKIDCIHNNAVMELMR	2	shared(2)	1	0.9665
							(0000000000000000),				48.03	30.96	1956.96	1955.97	2	MS2:90__Salt_one.8496.8496.2.dta
		MNTIAPNLTAMVGELVGAR	26	shared(2)	0	1
							(0000000000000000000),				84.27	29.04	1957.02	1957.01	3	MS2:30__Salt.12532.12532.3.dta
							(0000000000000000000),				93.45	29.05	1957.01	1957.01	2	MS2:100_acn_grad.8140.8140.2.dta
		EASVISMGTEIGELDLANIR	6	shared(2)	0	0.9998
							(00000000000000000000),				105.1	29.37	2118.07	2117.07	2	MS2:10__Salt.11351.11351.2.dta
		VNAASLDFSEILPEEVEAELK	10	distinct	0	0.9999
							(000000000000000000000),				86.7	29.18	2302.16	2302.16	2	MS2:100_acn_grad_Recal.7479.7479.2.dta
							(000000000000000000000),				38.33	29.23	2302.16	2302.16	3	MS2:100_acn_grad_Recal.7485.7485.3.dta
		AFSKFENTSEALEAATLLIDGK	103	shared(2)	1	1
							(0000000000000000000000),				66.98	28.6	2354.2	2354.2	3	MS2:90__Salt_one.11713.11713.3.dta
							(0000000000000000000000),				138.24	28.71	2354.2	2354.2	2	MS2:100_acn_grad.6669.6669.2.dta
		LMGDRVNAASLDFSEILPEEVEAELK	1	distinct	1	0.8441
							(00000000000000000000000000),				28.41	29.25	2875.44	2874.43	3	MS2:100__Salt.12300.12300.3.dta
		NQLTELISGLAVQDMAPMSLGLSHSLSR	21	shared(2)	0	0.9974
							(0000000000000000000000000000),				73.84	27.36	2967.52	2967.52	3	MS2:100__Salt.14130.14130.3.dta
		TYNPSADSVIGQMVDSAIDEDAQEPSVADK	4	distinct	0	0.9959
							(000000000000000000000000000000),				66.48	31.48	3151.41	3151.41	2	MS2:100_acn_grad.6541.6541.2.dta
		TYNPSADSVIGQMVDSAIDEDAQEPSVADKK	1	distinct	1	0.9847
							(0000000000000000000000000000000),				53.31	31.14	3279.52	3279.51	3	MS2:100_acn_grad_Recal.6484.6484.3.dta
																	Glyma11g12200.1	61040.2	NUCLEOLAR PROTEIN NOP56
30	1
		GSSFLDPK	4	shared(4)	0	0.7863
							(00000000),				29.63	28.77	849.423	849.423	2	MS2:40__Salt.3415.3415.2.dta
		VPFLFTIK	109	shared(4)	0	0.9914
							(00000000),				44.18	23.36	963.579	963.579	2	MS2:100_acn_grad.5141.5141.2.dta
							(00000000),				31.42	22.53	963.58	963.579	1	MS2:100_acn_grad.5162.5162.1.dta
		LTFDEIQSK	4	shared(4)	0	0.9972
							(000000000),				41.83	30.31	1079.55	1079.55	2	MS2:40__Salt.4430.4430.2.dta
							(000000000),				49.14	30.31	1079.55	1079.55	1	MS2:100_acn_grad.3240.3240.1.dta
		RLTFDEIQSK	71	shared(4)	1	0.9998
							(0000000000),				54.4	29.15	1235.65	1235.65	2	MS2:90__Salt_two.4656.4656.2.dta
							(0000000000),				39.55	29.53	1235.65	1235.65	3	MS2:60__Salt.4058.4058.3.dta
							(0000000000),				40.27	29.41	1235.65	1235.65	1	MS2:40__Salt.3846.3846.1.dta
		FCLEPTSFTVK	1	distinct	0	0.7594
							(00000000000),				27.52	30.74	1327.65	1327.65	2	MS2:100_acn_grad.4897.4897.2.dta
		KFCLEPTSFTVK	20	distinct	1	0.9756
							(000000000000),				53.11	30.36	1455.73	1455.74	2	MS2:70__Salt_Recal.5699.5699.2.dta
		GASTGYDNAVALPAGGR	4	shared(4)	0	0.9854
							(00000000000000000),				57.07	30.96	1575.76	1575.76	2	MS2:100_acn_grad.2859.2859.2.dta
		DGIDYAAVTVQLPGGER	4	shared(4)	0	0.9809
							(00000000000000000),				53.85	30.27	1759.88	1759.87	2	MS2:100_acn_grad_Recal.4309.4309.2.dta
		GRGASTGYDNAVALPAGGR	3	shared(4)	1	0.9899
							(0000000000000000000),				60.48	30.69	1788.89	1788.89	2	MS2:90__Salt_one.4049.4049.2.dta
		GTGTANQCPTIDGGLESFAFK	6	distinct	0	0.9993
							(000000000000000000000),				90.06	31.16	2170	2170	2	MS2:100_acn_grad.5380.5380.2.dta
		QLVASGKPDSFSGEFLVPSYR	184	shared(4)	0	1
							(000000000000000000000),				88.82	29.56	2283.14	2283.15	2	MS2:70__Salt_Recal.7091.7091.2.dta
							(000000000000000000000),				63.42	29.15	2283.16	2283.15	3	MS2:80__Salt.8142.8142.3.dta
		FEEKDGIDYAAVTVQLPGGER	4	shared(4)	1	1
							(000000000000000000000),				32.44	30.66	2293.11	2293.12	3	MS2:40__Salt_Recal.6757.6757.3.dta
							(000000000000000000000),				110.15	30.42	2293.12	2293.12	2	MS2:40__Salt.7425.7425.2.dta
		LTYTLDEIEGPFEVSSDGTVK	4	shared(3)	0	0.9929
							(000000000000000000000),				63.73	30.76	2299.11	2299.11	2	MS2:100_acn_grad.6126.6126.2.dta
		GASTGYDNAVALPAGGRGDEEELAK	33	shared(4)	1	1
							(0000000000000000000000000),				78.14	31.03	2447.16	2447.16	3	MS2:50__Salt.5028.5028.3.dta
							(0000000000000000000000000),				76.53	31.32	2447.14	2447.16	2	MS2:40__Salt_Recal.4141.4141.2.dta
		TKPETGEVIGVFQSLQPSDTDLGAK	28	distinct	0	1
							(0000000000000000000000000),				56.55	28.62	2616.33	2616.33	3	MS2:70__Salt.9367.9367.3.dta
							(0000000000000000000000000),				68.93	28.36	2616.34	2616.33	2	MS2:40__Salt.8874.8874.2.dta
		LTYTLDEIEGPFEVSSDGTVKFEEK	2	shared(3)	1	0.8108
							(0000000000000000000000000),				27.03	31.08	2833.36	2832.36	3	MS2:70__Salt.11771.11771.3.dta
																	Glyma02g06830.1	34834.8	unknown
31	1
		GLKDDLVK	8	shared(2)	1	0.9906
							(00000000),				52.24	29.28	886.512	886.512	2	MS2:80__Salt.3053.3053.2.dta
							(00000000),				36.29	29.28	886.513	886.512	1	MS2:60__Salt.3275.3275.1.dta
		RLDEVLR	14	shared(2)	1	0.9974
							(0000000),				48.75	28.27	899.525	899.519	2	MS2:60__Salt_Recal.2490.2490.2.dta
							(0000000),				48	28.13	899.519	899.519	1	MS2:60__Salt.3177.3177.1.dta
		DEPITLKR	1	distinct	1	0.815
							(00000000),				30.92	27.25	970.544	970.545	2	MS2:80__Salt.2864.2864.2.dta
		EHIVPPSQR	2	distinct	0	0.7813
							(000000000),				29.17	29.68	1061.56	1061.56	2	MS2:60__Salt_Recal.1985.1985.2.dta
		VTELKDELK	3	shared(2)	1	0.9331
							(000000000),				45.6	28.72	1073.59	1073.6	2	MS2:70__Salt.2981.2981.2.dta
		LDEVLRLER	1	shared(2)	1	0.8834
							(000000000),				35.77	27.22	1141.64	1141.64	2	MS2:60__Salt.4811.4811.2.dta
		KFNEVGNSEPAK	1	distinct	1	0.9157
							(000000000000),				38.92	30.09	1319.65	1318.65	2	MS2:60__Salt.2446.2446.2.dta
		FNEVGNSEPAKR	5	distinct	1	0.9946
							(000000000000),				70.3	30.35	1346.65	1346.66	2	MS2:90__Salt_two.2297.2297.2.dta
		SDSISTDSLSINQK	2	shared(2)	0	0.995
							(00000000000000),				70.44	30.64	1493.72	1493.72	2	MS2:10__Salt.3467.3467.2.dta
		NELKDTIITDNVK	2	shared(2)	1	0.9638
							(0000000000000),				47.94	29.19	1501.8	1501.8	2	MS2:30__Salt.3975.3975.2.dta
		LLVAEYVDPEEVK	9	shared(2)	0	0.9991
							(0000000000000),				89.78	29.38	1502.79	1502.79	2	MS2:100_acn_grad_Recal.2565.2565.2.dta
		TGNVSSFWMDQIK	1	shared(2)	0	0.9323
							(0000000000000),				41.27	31.15	1511.71	1511.71	2	MS2:100_acn_grad.4640.4640.2.dta
		IYYLPLSEEQVAAK	2	distinct	0	0.823
							(00000000000000),				29.38	28.92	1622.86	1622.86	2	MS2:100_acn_grad.4168.4168.2.dta
		GKGGFVDPIETGNVEK	2	distinct	1	0.9989
							(0000000000000000),				87.02	29.88	1645.83	1645.83	2	MS2:50__Salt.4422.4422.2.dta
		GPDAQSTTPRPATTPR	2	shared(2)	0	0.9185
							(0000000000000000),				37.93	31.12	1651.82	1651.83	2	MS2:70__Salt_Recal.1849.1849.2.dta
							(0000000200000000),	(0000000100000000).			28.48	31.47	1731.79	1731.79	2	MS2:40__Salt.2211.2211.2.dta
							(0000002000000000),	(0000001000000000).			26.65	31.47	1731.79	1731.79	2	MS2:40__Salt.2211.2211.2.dta
		MKLEPPPTQAASDSTDR	7	distinct	1	0.9998
							(00000000000000000),				44.22	31.41	1842.88	1842.88	3	MS2:70__Salt.3555.3555.3.dta
							(00000000000000000),				75.95	31.26	1842.88	1842.88	2	MS2:60__Salt.3506.3506.2.dta
		KVPEAVTVDAEMVDSTDR	2	distinct	1	0.9988
							(000000000000000000),				85.13	31.71	1960.94	1960.94	2	MS2:40__Salt.5180.5180.2.dta
		LEQDIVKPEMVEEPSSR	9	shared(2)	0	0.9991
							(00000000000000000),				55.83	30.35	1984.99	1984.98	2	MS2:100_acn_grad.2173.2173.2.dta
							(00000000000000000),				44.62	30.81	1984.98	1984.98	3	MS2:100_acn_grad.2102.2102.3.dta
		DDTHQDIDISPAALTEKR	1	distinct	1	0.9946
							(000000000000000000),				29.59	30.96	2023.98	2023.98	4	MS2:40__Salt.5127.5127.4.dta
							(000000000000000000),				51.46	30.93	2023.98	2023.98	3	MS2:40__Salt.5149.5149.3.dta
		SDSSATDDTPKEHIVPPSQR	12	distinct	1	0.9999
							(00010000000000000000),	(00020000000000000000):	(00030000000000000000),		26.96 - 30.14	31.41	2246.968: 2148.710	2245.985: 2148.008	3	MS2:40__Salt_Recal.2583.2583.3.dta MS3:40__Salt_Recal.2584.2584.3.dta
							(00100000000000000000),	(00200000000000000000).			41.58	31.5	2245.98	2245.99	3	MS2:60__Salt.3193.3193.3.dta
							(10000000000000000000),	(20000000000000000000).			36.25	31.5	2245.98	2245.99	3	MS2:60__Salt.3193.3193.3.dta
							(00300000000000000000),				49.54	46.67	2148.67	2148.01	3	MS3:60__Salt.3194.3194.3.dta
							(30000000000000000000),:		(10000000000000000000),	(20000000000000000000).	32.98 - 45.83	46.87	2148.710: 2246.968	2148.008: 2245.985	3	MS3:40__Salt_Recal.2584.2584.3.dta MS2:40__Salt_Recal.2583.2583.3.dta
							(00100000000000000000),	(00100000000000000000):	(00300000000000000000),		39.71 - 41.72	31.66	2245.983: 2148.342	2245.985: 2148.008	3	MS2:50__Salt.3101.3101.3.dta MS3:50__Salt.3102.3102.3.dta
							(00010000000000000000),	(00010000000000000000).			39.11	31.5	2245.98	2245.99	3	MS2:60__Salt.3193.3193.3.dta
							(00000200000000000000),	(00000100000000000000).			35.1	31.5	2245.98	2245.99	3	MS2:60__Salt.3193.3193.3.dta
							(00000000000000000000),				61.73	31.71	2166.01	2166.02	3	MS2:70__Salt.2997.2997.3.dta
							(00030000000000000000),				43.94	46.67	2148.67	2148.01	3	MS3:60__Salt.3194.3194.3.dta
							(00000000000000000000),				57.12	31.69	2166.02	2166.02	2	MS2:70__Salt.3015.3015.2.dta
		NDVPVSYDESHSMDVGGLHEK	5	shared(2)	0	0.9996
							(000000000000000000000),				97.6	31.08	2314.02	2314.02	2	MS2:50__Salt.4517.4517.2.dta
		NDVPVSYDESHSMDVGGLHEKK	4	shared(2)	1	0.9996
							(0000000000000000000000),				37.45	31.2	2442.11	2442.11	3	MS2:80__Salt.4148.4148.3.dta
							(0000000000000000000000),				66.97	31.16	2442.11	2442.11	2	MS2:80__Salt.4167.4167.2.dta
																	Glyma11g36120.1	75386.8	FAMILY NOT NAMED
32	1
		GAMIFYR	0	shared(2)	0	0.6248
							(0000000),				24.76	28.36	856.427	856.427	2	MS2:10__Salt.4125.4125.2.dta
		SATLFRPK	13	shared(2)	0	0.9264
							(00000000),				43.38	26.88	918.527	918.529	2	MS2:90__Salt_two.2954.2954.2.dta
		FAQALSER	3	shared(2)	0	0.9514
							(00000000),				46.59	29.1	920.471	920.472	2	MS2:100_acn_grad.1112.1112.2.dta
		MGTPALTSR	2	shared(4)	0	0.8474
							(000000000),				33.38	30.13	932.475	932.475	2	MS2:100_acn_grad.1230.1230.2.dta
		YSEGYPGAR	1	shared(4)	0	0.7053
							(000000000),				26.09	31.06	998.447	998.446	2	MS2:100_acn_grad.780.780.2.dta
		GFVEEDFVK	4	shared(2)	0	0.9926
							(000000000),				45.13	31.44	1068.51	1068.51	2	MS2:100_acn_grad.2187.2187.2.dta
							(000000000),				35.35	31.44	1068.51	1068.51	1	MS2:100_acn_grad.2488.2488.1.dta
		LIVAGASAYAR	4	shared(4)	0	0.9983
							(00000000000),				83.22	27.22	1090.61	1090.61	2	MS2:100_acn_grad.2581.2581.2.dta
		VAEFFDAAVK	4	shared(2)	0	0.9971
							(0000000000),				61.88	30.77	1095.56	1095.56	2	MS2:100_acn_grad.3053.3053.2.dta
							(0000000000),				28.2	30.77	1095.56	1095.56	1	MS2:100_acn_grad.3042.3042.1.dta
		VLEAVHIAANK	55	shared(4)	0	0.9999
							(00000000000),				79.64	26.14	1163.66	1163.67	2	MS2:60__Salt.3672.3672.2.dta
							(00000000000),				51.04	25.77	1163.66	1163.67	1	MS2:80__Salt.3480.3480.1.dta
		ALEAFRLDPAK	3	shared(3)	1	0.7421
							(00000000000),				26.34	29.06	1229.67	1229.68	2	MS2:80__Salt.5607.5607.2.dta
		LRLDVEEYAK	10	distinct	1	0.9939
							(0000000000),				35.71	29.42	1234.65	1234.66	2	MS2:50__Salt.5033.5034.2.dta
							(0000000000),				47.43	29.3	1234.66	1234.66	3	MS2:40__Salt.4811.4811.3.dta
		AYQEQVLSNSFK	1	shared(2)	0	0.7374
							(000000000000),				26.13	30.79	1412.69	1412.69	2	MS2:20__Salt.4319.4319.2.dta
		NTVPGDVSAMVPGGIR	8	shared(4)	0	0.997
							(0000000000000000),				58.16	29.59	1569.8	1568.8	2	MS2:10__Salt.5102.5102.2.dta
							(0000000000000000),				28.47	30.17	1568.8	1568.8	3	MS2:10__Salt.6252.6252.3.dta
		ISAVSIFFETMPYR	41	shared(4)	0	0.9997
							(00000000000000),				82.63	30.29	1659.83	1659.83	2	MS2:50__Salt.11367.11367.2.dta
							(00000000000000),				32.55	30.13	1659.83	1659.83	3	MS2:50__Salt.11305.11305.3.dta
		KISAVSIFFETMPYR	1	shared(4)	1	0.7585
							(000000000000000),				25.4	28.76	1787.93	1787.93	2	MS2:100__Salt.10438.10438.2.dta
		YYGGNEYIDMAETLCQK	4	shared(4)	0	0.9997
							(00000000000000000),				102.6	31.02	2053.88	2053.88	2	MS2:10__Salt.7710.7710.2.dta
		SYELVSGGTENHLVLVNLK	22	distinct	0	0.9997
							(0000000000000000000),				41	26.99	2071.09	2071.09	3	MS2:80__Salt.7809.7809.3.dta
							(0000000000000000000),				68.88	27.02	2071.1	2071.09	2	MS2:90__Salt_one.7954.7954.2.dta
		YYGGNEYIDMAETLCQKR	10	shared(4)	1	0.9982
							(000000000000000000),				39.77	31.34	2209.98	2209.98	3	MS2:80__Salt.8166.8166.3.dta
							(000000000000000000),				51.74	31.34	2209.98	2209.98	2	MS2:80__Salt.7880.7880.2.dta
		LKDFLATIESSSTFQSEIAK	19	distinct	1	0.9999
							(00000000000000000000),				87.3	28.55	2214.15	2214.14	2	MS2:90__Salt_one.10210.10210.2.dta
							(00000000000000000000),				49.68	28.66	2214.14	2214.14	3	MS2:50__Salt.10229.10229.3.dta
		SSLPDEAVYDKERPGVTWPK	6	distinct	1	0.9977
							(00000000000000000000),				33.21	30.42	2273.13	2273.13	3	MS2:90__Salt_two.6017.6017.3.dta
							(00000000000000000000),				53.31	30.27	2273.13	2273.13	2	MS2:90__Salt_one.6103.6103.2.dta
		QLNAPLEVVDPEIADIIELEK	13	distinct	0	1
							(000000000000000000000),				89.32	25.83	2348.26	2347.25	2	MS2:100_acn_grad.7876.7876.2.dta
							(000000000000000000000),				82.53	26.1	2347.26	2347.25	3	MS2:100_acn_grad.7514.7514.3.dta
		QLNAPLEVVDPEIADIIELEKAR	2	distinct	1	0.9227
							(00000000000000000000000),				36.47	24.28	2574.39	2574.39	3	MS2:100__Salt.12225.12225.3.dta
		GLELIPSENFTSVSVMQAVGSVMTNK	5	shared(2)	0	0.9983
							(00000000000000000000000000),				24.98	29.57	2737.37	2737.37	3	MS2:90__Salt_two.13415.13415.3.dta
							(00000000000000000000000000),				60.31	29.93	2737.35	2737.37	2	MS2:10__Salt.13571.13571.2.dta
																	Glyma08g37270.1	57433.6	SERINE HYDROXYMETHYLTRANSFERASE
33	1
		EVHIYR	1	distinct	0	0.7492
							(000000),				32.09	28.69	815.428	815.429	1	MS2:80__Salt.2761.2761.1.dta
		ISITPIPLK	1	distinct	0	0.6303
							(000000000),				24.24	18.51	981.632	980.627	2	MS2:20__Salt.5913.5913.2.dta
		VGLFIAENR	3	shared(2)	0	0.7515
							(000000000),				29.37	30.15	1017.55	1017.56	2	MS2:100_acn_grad.2141.2141.2.dta
		YFLFILSTR	9	shared(2)	0	0.9747
							(000000000),				53.64	29.13	1158.64	1158.64	2	MS2:70__Salt.10216.10216.2.dta
		AAAIAWWNSLR	6	distinct	0	0.9652
							(00000000000),				49.07	28.61	1257.66	1257.66	2	MS2:10__Salt.8706.8706.2.dta
		YLILDEAHLIK	1	shared(2)	0	0.905
							(00000000000),				38.52	25.89	1327.76	1326.76	2	MS2:50__Salt.7806.7806.2.dta
		NLVAAALDDITTR	1	distinct	0	0.9423
							(0000000000000),				42.56	28.86	1371.74	1371.74	2	MS2:100_acn_grad.5519.5519.2.dta
		FLELWDPIIDK	2	distinct	0	0.9757
							(00000000000),				53.36	29.45	1387.74	1387.74	2	MS2:100_acn_grad.6608.6608.2.dta
		ESEDIIADAAAAAR	2	shared(2)	0	0.994
							(00000000000000),				68.49	30.95	1401.67	1401.67	2	MS2:100_acn_grad.3480.3480.2.dta
		TDMTELEVIRPQK	5	distinct	0	0.9902
							(0000000000000),				50.33	29.96	1558.8	1558.8	2	MS2:40__Salt.5230.5230.2.dta
							(0000000000000),				25.31	30	1558.8	1558.8	3	MS2:40__Salt.5216.5216.3.dta
		KLQGTNIFEEIQR	1	distinct	1	0.9987
							(0000000000000),				85.48	28.05	1574.84	1574.84	2	MS2:80__Salt.6682.6682.2.dta
		VDTIDPKDEIALLQK	3	distinct	1	0.9685
							(000000000000000),				26.07	26.36	1696.92	1696.92	3	MS2:50__Salt.7659.7659.3.dta
							(000000000000000),				33.01	26.46	1697.92	1696.92	2	MS2:70__Salt_Recal.4149.4149.2.dta
		ALDNLVIQSGGYNTEFFK	1	shared(2)	0	0.9103
							(000000000000000000),				35.9	30.58	2014.99	2015	2	MS2:100_acn_grad.5538.5538.2.dta
		FLELWDPIIDKTALESEVR	4	distinct	1	0.9686
							(0000000000000000000),				25.79	26.91	2273.2	2273.19	3	MS2:50__Salt.12044.12044.3.dta
							(0000000000000000000),				30.39	27.14	2274.19	2273.19	2	MS2:50__Salt.12098.12098.2.dta
																	Glyma09g17220.1	231021	ATP-DEPENDENT HELICASE SMARCA (SWI/SNF-RELATED MATRIX-ASSOCIATED ACTIN-DEPENDENT REGULATOR OF CHROMATIN A)-RELATED
																	Glyma09g17220.2	231021	unknown
34	1
		QVATAVIK	0	distinct	0	0.6485
							(00000000),				25.37	29.15	829.504	828.507	2	MS2:50__Salt.2223.2223.2.dta
		AQGRPLIDFPK	2	distinct	0	0.711
							(00000000000),				24.52	26.82	1240.69	1240.69	2	MS2:90__Salt_two.5162.5162.2.dta
		ENIDPDALPFAR	1	distinct	0	0.8685
							(000000000000),				36.72	30.33	1356.67	1356.67	2	MS2:40__Salt.6607.6608.2.dta
		IVSDGMLQAAAER	1	distinct	0	0.9945
							(0000000000000),				69.66	30.09	1359.68	1359.68	2	MS2:100_acn_grad.3466.3466.2.dta
		LHDRNETMYYK	2	distinct	1	0.9208
							(00000000000),				40.32	31.27	1468.68	1468.68	2	MS2:100__Salt.2629.2629.2.dta
		SLDILHDPWFNK	26	distinct	0	0.9985
							(000000000000),				41.79	30.67	1483.75	1483.75	3	MS2:60__Salt_Recal.8117.8117.3.dta
							(000000000000),				56.6	30.52	1483.75	1483.75	2	MS2:80__Salt.9318.9318.2.dta
		LDLYVAAAGINPQR	1	distinct	0	0.7804
							(00000000000000),				26.77	28.25	1499.81	1499.81	2	MS2:10__Salt.5390.5390.2.dta
		VLPVMIDVGTNNEK	1	distinct	0	0.9607
							(00000000000000),				46.56	28.94	1527.8	1527.8	2	MS2:10__Salt.4923.4923.2.dta
		LLEDPLYLGLQQHR	11	distinct	0	0.9998
							(00000000000000),				47.46	27.27	1693.91	1693.91	3	MS2:70__Salt_Recal.6995.6995.3.dta
							(00000000000000),				68.77	27.27	1694.91	1693.91	2	MS2:70__Salt_Recal.6979.6979.2.dta
		GSTSTRPAIFAMSNPTK	1	distinct	0	0.7674
							(00000000000000000),				25.26	29.8	1764.88	1764.88	2	MS2:90__Salt_two.4891.4891.2.dta
		MFNDDVQGTAGVAIAGLLGAVR	3	distinct	0	0.9886
							(0000000000000000000000),				59.78	29.1	2174.12	2174.11	3	MS2:10__Salt.12030.12030.3.dta
																	Glyma03g24630.1	69110.5	MALIC ENZYME-RELATED
35	1
		GIMIKPR	2	distinct	0	0.5413
							(0000000),				23.73	27	813.496	813.489	2	MS2:100__Salt_Recal.2220.2220.2.dta
		APALFLAK	2	shared(2)	0	0.9051
							(00000000),				18.31	21.34	830.515	829.506	1	MS2:100_acn_grad.1753.1753.1.dta
							(00000000),				30.93	28.98	829.506	829.506	2	MS2:10__Salt.4390.4391.2.dta
		ECLLIDPK	3	shared(2)	0	0.958
							(00000000),				27.58	29.36	986.51	986.511	2	MS2:40__Salt.4410.4410.2.dta
							(00000000),				32.84	29.03	986.512	986.511	1	MS2:100_acn_grad.3134.3134.1.dta
		TVEHMFEK	7	distinct	0	0.969
							(00000000),				33.91	29.76	1019.47	1019.48	1	MS2:60__Salt.3049.3049.1.dta
							(00000000),				30.19	29.58	1020.48	1019.48	2	MS2:60__Salt.3228.3228.2.dta
		YKAPALFLAK	8	shared(2)	1	0.7213
							(0000000000),				24.31	22.41	1120.66	1120.66	2	MS2:90__Salt_one_Recal.4664.4664.2.dta
		NAVLTSFASGR	4	shared(3)	0	0.998
							(00000000000),				59	29.76	1121.58	1121.58	1	MS2:100_acn_grad.3296.3296.1.dta
							(00000000000),				34.27	30.14	1121.58	1121.58	2	MS2:10__Salt.3125.3125.2.dta
		DHMEVLSPFK	28	shared(2)	0	0.9999
							(0000000000),				51.71	29.88	1201.58	1201.58	2	MS2:40__Salt_Recal.4859.4859.2.dta
							(0000000000),				75.91	29.62	1201.58	1201.58	1	MS2:50__Salt.5606.5606.1.dta
		DLLEESPQAAR	3	shared(3)	0	0.9807
							(00000000000),				56.07	29.85	1227.61	1227.61	2	MS2:100_acn_grad.2433.2433.2.dta
		LYVGSQSLGYR	4	shared(3)	0	0.9968
							(00000000000),				48.51	29.48	1241.64	1241.64	2	MS2:100_acn_grad.3322.3322.2.dta
							(00000000000),				38.73	29.09	1241.64	1241.64	1	MS2:100_acn_grad.2975.2975.1.dta
		GLPQMVIESINK	5	shared(2)	0	0.9777
							(000000000000),				53.76	28.67	1327.72	1327.72	2	MS2:10__Salt.6499.6499.2.dta
		KLYVGSQSLGYR	23	shared(2)	1	0.9869
							(000000000000),				59.8	28.41	1369.73	1369.73	2	MS2:100__Salt.4157.4157.2.dta
		SEYEEHGASYIQR	22	shared(2)	0	0.9995
							(0000000000000),				79.66	30.21	1567.68	1567.69	2	MS2:40__Salt_Recal.2498.2498.2.dta
							(0000000000000),				30.91	30.44	1567.69	1567.69	3	MS2:30__Salt.2705.2705.3.dta
		IEKDLLEESPQAAR	12	shared(3)	1	0.9999
							(00000000000000),				64.17	29.48	1597.83	1597.83	3	MS2:60__Salt.4125.4125.3.dta
							(00000000000000),				76.51	29.53	1597.83	1597.83	2	MS2:40__Salt.3701.3701.2.dta
		AVATSPIGGEFLTDCLMK	4	shared(2)	0	1
							(000000000000000000),				121.75	30.83	1908.93	1908.93	2	MS2:100_acn_grad.5560.5560.2.dta
		EHPMLLAEPSSNSQQQR	15	shared(2)	0	1
							(00000000000000000),				62.68	31.46	1950.92	1950.92	3	MS2:70__Salt_Recal.3008.3008.3.dta
							(00000000000000000),				87.01	31.6	1950.92	1950.92	2	MS2:70__Salt.3611.3611.2.dta
		ELFNSILLAGGTASMQQLK	1	distinct	0	0.7671
							(0000000000000000000),				23.87	27.37	2020.07	2020.07	2	MS2:100_acn_grad.6106.6106.2.dta
		GLPQMVIESINKCDVDIR	1	shared(2)	1	0.8267
							(000000000000000000),				28.07	29.21	2087.06	2086.05	2	MS2:60__Salt.10065.10065.2.dta
		RELFNSILLAGGTASMQQLK	1	distinct	1	0.9839
							(00000000000000000000),				55.87	25.56	2176.17	2176.17	3	MS2:90__Salt_two.9505.9505.3.dta
		ATSVVVDGGGGSTTVAPVHDGYVLQK	68	distinct	0	1
							(00000000000000000000000000),				96.47	28.83	2513.27	2513.28	3	MS2:40__Salt.4902.4902.3.dta
							(00000000000000000000000000),				41.86	29.13	2514.28	2513.28	2	MS2:60__Salt.5128.5128.2.dta
		EIRPGEFQTVDLEFPNTTESYK	51	shared(2)	0	1
							(0000000000000000000000),				68.87	30.95	2599.24	2599.24	3	MS2:90__Salt_one.8825.8825.3.dta
							(0000000000000000000000),				82.59	30.99	2599.24	2599.24	2	MS2:70__Salt.8875.8875.2.dta
		KEIRPGEFQTVDLEFPNTTESYK	10	shared(2)	1	0.9999
							(00000000000000000000000),				65.61	30.03	2727.34	2727.34	3	MS2:90__Salt_two.7565.7565.3.dta
							(00000000000000000000000),				30.15	30.3	2727.33	2727.34	4	MS2:100__Salt.7458.7458.4.dta
							(00000000000000000000000),				36.53	29.99	2727.34	2727.34	2	MS2:100__Salt.7496.7496.2.dta
		IPDVLFNPSLVQSIPGMESFAEIAPSVR	4	distinct	0	0.9977
							(0000000000000000000000000000),				72.53	26.75	3012.56	3012.56	2	MS2:10__Salt.14574.14574.2.dta
		APDTPYDESAYSNIPMTSYELPDGQTVEIGADR	1	distinct	0	0.9827
							(000000000000000000000000000000000),				51.14	31.26	3601.61	3601.6	3	MS2:100_acn_grad.5826.5826.3.dta
		AVFPSVVGAIDQMDVDEADNGEKNPGSAPESNNNNVR	5	distinct	1	1
							(0000000000000000000000000000000000000),				182.1	30.57	3856.77	3855.76	3	MS2:100_acn_grad.5347.5347.3.dta
		APDTPYDESAYSNIPMTSYELPDGQTVEIGADRFK	10	distinct	1	1
							(00000000000000000000000000000000000),				131.43	30.9	3877.77	3876.77	3	MS2:100_acn_grad.5754.5754.3.dta
																	Glyma07g13230.1	49426.5	ACTIN
36	1
		IHNFGMK	1	distinct	0	0.9202
							(0000000),				41.19	28.47	845.423	845.422	1	MS2:90__Salt_two.2768.2768.1.dta
		VHITDAQK	10	shared(2)	0	0.9877
							(00000000),				37.54	27.72	910.487	910.487	2	MS2:70__Salt.2037.2037.2.dta
							(00000000),				36.23	27.9	910.488	910.487	1	MS2:80__Salt.1984.1984.1.dta
		DHANYYSPR	12	shared(2)	0	0.9966
							(000000000),				39.86	29.38	1121.49	1121.49	1	MS2:40__Salt.2377.2377.1.dta
							(000000000),				48.47	29.75	1121.49	1121.49	2	MS2:80__Salt.2364.2364.2.dta
		TYGPDIPLLR	4	shared(2)	0	0.7819
							(0000000000),				28.73	29.38	1143.63	1143.63	2	MS2:20__Salt.6891.6891.2.dta
		TRWDDPPYK	2	distinct	1	0.7646
							(000000000),				28.54	30.56	1176.56	1176.56	2	MS2:60__Salt.3472.3472.2.dta
		WEVPYNLLPR	3	shared(3)	0	0.6894
							(0000000000),				24.66	29.22	1285.68	1285.68	2	MS2:10__Salt.7684.7684.2.dta
		TVSWWVDEIR	1	shared(2)	0	0.7737
							(0000000000),				28.46	30.04	1289.64	1289.64	2	MS2:10__Salt.8414.8414.2.dta
		TVSWWVDEIRR	3	shared(2)	1	0.7868
							(00000000000),				31.02	29.69	1445.74	1445.74	3	MS2:90__Salt_two.7895.7895.3.dta
		WIEVGAFYPFSR	92	shared(3)	0	0.9996
							(000000000000),				77.21	30.58	1470.73	1470.73	2	MS2:50__Salt.10002.10002.2.dta
							(000000000000),				32.99	30.35	1470.73	1470.73	1	MS2:10__Salt.10598.10598.1.dta
		DFTLNPVNYPRPK	45	shared(2)	0	0.9941
							(0000000000000),				47.47	29.69	1559.81	1559.81	2	MS2:90__Salt_two.6256.6256.2.dta
							(0000000000000),				33.84	29.58	1559.81	1559.81	3	MS2:90__Salt_one.6299.6299.3.dta
		QELYQWQSVAESAR	11	shared(2)	0	0.9972
							(00000000000000),				77.22	31.42	1693.81	1693.81	2	MS2:100_acn_grad.4386.4386.2.dta
		DASLYGLGENTQPHGIK	94	shared(3)	0	1
							(00000000000000000),				84.65	31.14	1798.87	1798.88	2	MS2:40__Salt_Recal.4208.4208.2.dta
							(00000000000000000),				65.87	31.08	1798.88	1798.88	3	MS2:50__Salt.4913.4913.3.dta
		LVSIEETPDGGLIGILQVK	13	shared(2)	0	0.9986
							(0000000000000000000),				61.68	23.52	1980.11	1980.11	2	MS2:10__Salt.10246.10246.2.dta
							(0000000000000000000),				28.6	23.6	1980.12	1980.11	3	MS2:10__Salt.9066.9066.3.dta
		YAAHWTGDNQGTWENLR	46	shared(2)	0	0.9999
							(00000000000000000),				46.41	31.86	2017.9	2017.9	3	MS2:80__Salt.6043.6043.3.dta
							(00000000000000000),				77.79	31.92	2017.9	2017.9	2	MS2:80__Salt.5814.5814.2.dta
		AQIPLDVIWNDDDHMEGK	1	distinct	0	0.9817
							(000000000000000000),				54.21	31.32	2094.98	2094.97	2	MS2:100_acn_grad.5107.5107.2.dta
		AQIPLDVIWNDDDHMEGKK	2	distinct	1	0.9995
							(0000000000000000000),				30.9	31.73	2223.06	2223.06	3	MS2:70__Salt.7978.7978.3.dta
							(0000000000000000000),				74.96	31.76	2223.06	2223.06	2	MS2:70__Salt.8008.8008.2.dta
		KAQIPLDVIWNDDDHMEGK	1	distinct	1	0.942
							(0000000000000000000),				43.04	31.47	2224.07	2223.06	3	MS2:80__Salt.7971.7971.3.dta
		KSNGETLFDTTSGDSDPFSSLVFK	1	distinct	1	0.8905
							(000000000000000000000000),				31.44	31.62	2579.19	2578.21	2	MS2:100_acn_grad.6364.6364.2.dta
		CKIPEGQCPTGTGPGWICCLDCK	2	distinct	1	0.9963
							(00000000000000000000000),				72.87	31.39	2693.15	2693.15	3	MS2:90__Salt_two.6879.6879.3.dta
		YDGEPFLAQVWPGAVNFPDFLNPK	24	shared(2)	0	0.9999
							(000000000000000000000000),				42.08	29.97	2720.34	2720.33	3	MS2:10__Salt.14621.14621.3.dta
							(000000000000000000000000),				77.13	30.08	2720.34	2720.33	2	MS2:10__Salt.13988.13988.2.dta
		FHELVPVDGLWIDMNEVSNFCSGK	4	distinct	0	0.9844
							(000000000000000000000000),				55.99	31.57	2792.3	2792.29	3	MS2:80__Salt.12334.12334.3.dta
		SNGETLFDTTSGDSDPFSSLVFKDQYLEISTK	5	distinct	1	0.9526
							(00000000000000000000000000000000),				39.82	30.35	3528.65	3527.65	3	MS2:60__Salt.11026.11026.3.dta
		LYPSDPYTLYTTDISAINLNADLYGSHPVYMDLR	97	shared(2)	0	1
							(0000000000000000000000000000000000),				141.96	29.14	3890.88	3890.87	3	MS2:90__Salt_one.12793.12793.3.dta
							(0000000000000000000000000000000000),				75.33	29.26	3890.88	3890.87	4	MS2:90__Salt_one.13027.13027.4.dta
																	Glyma08g31890.1	103496	ALPHA-GLUCOSIDASE
37	1
		SLAMIFK	1	distinct	0	0.7085
							(0000000),				26.53	28.93	808.451	808.452	1	MS2:100_acn_grad.3566.3566.1.dta
		LYIVSALAGTK	2	distinct	0	0.9876
							(00000000000),				33.08	24.17	1134.66	1134.66	1	MS2:100_acn_grad.4185.4185.1.dta
							(00000000000),				36.35	23.78	1134.66	1134.66	2	MS2:30__Salt.6738.6738.2.dta
		DVSLLLDQGFK	1	shared(2)	0	0.9885
							(00000000000),				61.7	28.57	1233.66	1233.66	1	MS2:100_acn_grad.4959.4959.1.dta
		DANHVSVDNGANTVSAK	9	distinct	0	0.976
							(00000000000000000),				51.44	31.05	1697.8	1697.8	2	MS2:40__Salt.2327.2327.2.dta
		TSQLLLSEVKDENIK	17	distinct	1	0.9966
							(000000000000000),				55.71	26.87	1715.93	1715.93	2	MS2:80__Salt.5583.5583.2.dta
							(000000000000000),				29.15	26.89	1715.93	1715.93	3	MS2:50__Salt.5289.5289.3.dta
		LHGEQLGTVLSDKLQK	4	distinct	1	0.9999
							(0000000000000000),				38.44	25.48	1764.97	1764.97	3	MS2:100__Salt.5099.5099.3.dta
							(0000000000000000),				32.47	25.29	1764.97	1764.97	4	MS2:100__Salt.5127.5127.4.dta
							(0000000000000000),				61.01	25.48	1764.97	1764.97	2	MS2:100__Salt.5171.5171.2.dta
		SIGRNPSYVDLETNPTVGK	2	distinct	1	0.9958
							(0000000000000000000),				40.82	29.12	2047.04	2046.04	2	MS2:90__Salt_one.4967.4967.2.dta
							(0000000000000000000),				39.37	29.42	2046.04	2046.04	3	MS2:90__Salt_one.5018.5018.3.dta
		NVNSSGSFADAGQFVEEILQK	4	distinct	0	0.9999
							(000000000000000000000),				89.06	30.91	2239.07	2239.08	2	MS2:100_acn_grad.7447.7447.2.dta
							(000000000000000000000),				28.84	30.81	2240.08	2239.08	3	MS2:10__Salt.11762.11762.3.dta
		MAPEEALGEVLQVPLGCVTPFALVNESAR	5	distinct	0	0.9961
							(00000000000000000000000000000),				69.29	28.94	3096.57	3096.56	3	MS2:20__Salt.13789.13789.3.dta
																	Glyma06g11680.2	33849.5	unknown
																	Glyma06g11680.3	34901.2	unknown
38	1
		IHNIGMK	2	distinct	0	0.9471
							(0000000),				45.55	27.02	811.438	811.437	1	MS2:100__Salt.2334.2334.1.dta
		LLNFLDK	7	distinct	0	0.96
							(0000000),				41.32	27.19	861.496	861.496	2	MS2:100_acn_grad.4479.4479.2.dta
							(0000000),				22.45	27.19	861.496	861.496	1	MS2:10__Salt.6056.6056.1.dta
		VHITDAQK	10	shared(2)	0	0.9877
							(00000000),				37.54	27.72	910.487	910.487	2	MS2:70__Salt.2037.2037.2.dta
							(00000000),				36.23	27.9	910.488	910.487	1	MS2:80__Salt.1984.1984.1.dta
		DHANYYSPR	12	shared(2)	0	0.9966
							(000000000),				39.86	29.38	1121.49	1121.49	1	MS2:40__Salt.2377.2377.1.dta
							(000000000),				48.47	29.75	1121.49	1121.49	2	MS2:80__Salt.2364.2364.2.dta
		TYGPDIPLLR	4	shared(2)	0	0.7819
							(0000000000),				28.73	29.38	1143.63	1143.63	2	MS2:20__Salt.6891.6891.2.dta
		WEVPYNLLPR	3	shared(3)	0	0.6894
							(0000000000),				24.66	29.22	1285.68	1285.68	2	MS2:10__Salt.7684.7684.2.dta
		TVSWWVDEIHR	29	distinct	0	0.9999
							(00000000000),				49.18	30.53	1426.7	1426.7	3	MS2:60__Salt_Recal.6661.6661.3.dta
							(00000000000),				65.61	30.74	1426.69	1426.7	2	MS2:70__Salt_Recal.6622.6622.2.dta
							(00000000000),				32.66	30.68	1426.7	1426.7	1	MS2:60__Salt.7635.7635.1.dta
		WIEVGAFYPFSR	92	shared(3)	0	0.9996
							(000000000000),				77.21	30.58	1470.73	1470.73	2	MS2:50__Salt.10002.10002.2.dta
							(000000000000),				32.99	30.35	1470.73	1470.73	1	MS2:10__Salt.10598.10598.1.dta
		DFTLNPVNYPRPK	45	shared(2)	0	0.9941
							(0000000000000),				47.47	29.69	1559.81	1559.81	2	MS2:90__Salt_two.6256.6256.2.dta
							(0000000000000),				33.84	29.58	1559.81	1559.81	3	MS2:90__Salt_one.6299.6299.3.dta
		QELYQWQSVAESAR	11	shared(2)	0	0.9972
							(00000000000000),				77.22	31.42	1693.81	1693.81	2	MS2:100_acn_grad.4386.4386.2.dta
		DASLYGLGENTQPHGIK	94	shared(3)	0	1
							(00000000000000000),				84.65	31.14	1798.87	1798.88	2	MS2:40__Salt_Recal.4208.4208.2.dta
							(00000000000000000),				65.87	31.08	1798.88	1798.88	3	MS2:50__Salt.4913.4913.3.dta
		LVSIEETPDGGLIGILQVK	13	shared(2)	0	0.9986
							(0000000000000000000),				61.68	23.52	1980.11	1980.11	2	MS2:10__Salt.10246.10246.2.dta
							(0000000000000000000),				28.6	23.6	1980.12	1980.11	3	MS2:10__Salt.9066.9066.3.dta
		YAAHWTGDNQGTWENLR	46	shared(2)	0	0.9999
							(00000000000000000),				46.41	31.86	2017.9	2017.9	3	MS2:80__Salt.6043.6043.3.dta
							(00000000000000000),				77.79	31.92	2017.9	2017.9	2	MS2:80__Salt.5814.5814.2.dta
		AQIPLDVIWNDDDHMDGK	3	distinct	0	0.9903
							(000000000000000000),				61.46	31.56	2080.95	2080.95	2	MS2:100_acn_grad.5246.5246.2.dta
		AQIPLDVIWNDDDHMDGKK	11	distinct	1	0.9992
							(0000000000000000000),				32.19	31.3	2209.05	2209.05	4	MS2:60__Salt.8315.8315.4.dta
							(0000000000000000000),				65.9	31.35	2209.05	2209.05	2	MS2:60__Salt.8084.8084.2.dta
		KAQIPLDVIWNDDDHMDGK	3	distinct	1	0.9667
							(0000000000000000000),				49.33	31.37	2209.05	2209.05	3	MS2:70__Salt.8027.8027.3.dta
		SNGETLFDSSSGDSDPFSSLVFK	2	distinct	0	0.9991
							(00000000000000000000000),				86.5	31.61	2423.07	2422.08	2	MS2:100_acn_grad_Recal.7067.7067.2.dta
		KSNGETLFDSSSGDSDPFSSLVFK	16	distinct	1	0.9999
							(000000000000000000000000),				56.87	31.23	2550.18	2550.18	3	MS2:40__Salt.10227.10227.3.dta
							(000000000000000000000000),				66.51	31.44	2551.16	2550.18	2	MS2:100_acn_grad.6164.6164.2.dta
		YDGEPFLAQVWPGAVNFPDFLNPK	24	shared(2)	0	0.9999
							(000000000000000000000000),				42.08	29.97	2720.34	2720.33	3	MS2:10__Salt.14621.14621.3.dta
							(000000000000000000000000),				77.13	30.08	2720.34	2720.33	2	MS2:10__Salt.13988.13988.2.dta
		SNGETLFDSSSGDSDPFSSLVFKDQYLEISTK	15	distinct	1	0.9998
							(00000000000000000000000000000000),				101.69	31.24	3499.62	3499.61	3	MS2:70__Salt.11445.11445.3.dta
		GNLFLDNDELPDMNLGNGYSTYVDLHATVDQGAVK	2	distinct	0	0.9992
							(00000000000000000000000000000000000),				85.52	30.7	3795.78	3794.77	3	MS2:90__Salt_one.11642.11642.3.dta
		LYPSDPYTLYTTDISAINLNADLYGSHPVYMDLR	97	shared(2)	0	1
							(0000000000000000000000000000000000),				141.96	29.14	3890.88	3890.87	3	MS2:90__Salt_one.12793.12793.3.dta
							(0000000000000000000000000000000000),				75.33	29.26	3890.88	3890.87	4	MS2:90__Salt_one.13027.13027.4.dta
																	Glyma01g20460.1	97226.8	ALPHA-GLUCOSIDASE
39	1
		FGDLILK	1	shared(2)	0	0.4464
							(0000000),				23.07	26.32	804.475	804.475	1	MS2:100_acn_grad.1693.1693.1.dta
		HDVNLGR	6	shared(2)	0	0.9015
							(0000000),				26.73	29.85	809.414	809.414	2	MS2:30__Salt.1654.1654.2.dta
							(0000000),				25.07	29.83	809.414	809.414	1	MS2:60__Salt.2017.2017.1.dta
		MLLKPDK	2	shared(2)	0	0.9916
							(0000000),				35.95	30.99	843.489	843.489	2	MS2:90__Salt_one.2959.2959.2.dta
							(0000000),				49.39	30.99	843.489	843.489	1	MS2:90__Salt_one.2972.2972.1.dta
		HTLAYDK	12	shared(2)	0	0.9895
							(0000000),				43.59	29.46	846.424	846.424	2	MS2:60__Salt.2085.2085.2.dta
							(0000000),				33.53	29.34	846.423	846.424	1	MS2:80__Salt.2154.2154.1.dta
		SVFWDMK	2	shared(2)	0	0.8836
							(0000000),				37.55	31.29	911.42	911.421	1	MS2:100_acn_grad.3680.3680.1.dta
		LINGPSYR	1	shared(2)	0	0.7472
							(00000000),				27.8	29.14	918.491	918.492	2	MS2:10__Salt.2403.2403.2.dta
		LLILALER	7	distinct	0	0.9568
							(00000000),				45.41	18.2	939.611	939.612	2	MS2:50__Salt.7373.7373.2.dta
		VQMLLSDR	2	shared(2)	0	0.9241
							(00000000),				41.82	30.41	960.506	960.506	2	MS2:40__Salt.4024.4024.2.dta
		LIIRSPLR	0	shared(2)	1	0.6433
							(00000000),				23.08	18.26	966.626	966.634	2	MS2:80__Salt_Recal.3971.3971.2.dta
		FIPHAVYK	3	distinct	0	0.6839
							(00000000),				25.46	30.04	973.532	973.539	1	MS2:100__Salt_Recal.2619.2619.1.dta
		IDLTMLNR	2	shared(2)	0	0.9714
							(00000000),				52.95	30.46	974.522	974.522	2	MS2:100_acn_grad.3482.3482.2.dta
		ISLIQIFR	2	shared(2)	0	0.8891
							(00000000),				35.67	22.6	988.606	988.607	2	MS2:40__Salt.9190.9190.2.dta
		FICVADLR	10	distinct	0	0.9634
							(00000000),				34.04	29.54	992.512	992.511	2	MS2:100_acn_grad.2437.2437.2.dta
							(00000000),				28.11	29.54	992.512	992.511	1	MS2:100_acn_grad.3120.3120.1.dta
		KWQQLNSK	3	shared(2)	1	0.6786
							(00000000),				25.33	30.29	1030.56	1030.56	2	MS2:90__Salt_two.2651.2651.2.dta
		SNPALYVLR	1	shared(2)	0	0.8326
							(000000000),				31.92	28.39	1031.58	1031.58	2	MS2:100_acn_grad.2032.2032.2.dta
		KFGFVETQK	3	shared(2)	1	0.7618
							(000000000),				27.93	28.52	1082.58	1082.58	2	MS2:80__Salt_Recal.2799.2799.2.dta
		LWNLNNYR	1	shared(2)	0	0.8563
							(00000000),				34.47	30.13	1091.55	1091.55	2	MS2:100_acn_grad.3515.3515.2.dta
		YWIDVQLR	1	shared(2)	0	0.8295
							(00000000),				32.41	29.64	1091.58	1091.58	2	MS2:50__Salt.7190.7190.2.dta
		KFICVADLR	3	distinct	1	0.9369
							(000000000),				45.46	29.14	1120.61	1120.61	2	MS2:90__Salt_two.5471.5471.2.dta
		AISATNLYLR	2	shared(2)	0	0.9898
							(0000000000),				63.16	27.24	1120.62	1120.62	2	MS2:100_acn_grad.3690.3690.2.dta
		VWAEYALKR	1	shared(2)	1	0.8383
							(000000000),				32.24	28.08	1134.62	1134.62	2	MS2:90__Salt_two.4728.4728.2.dta
		ALNMCIPGGPK	2	shared(2)	0	0.9352
							(00000000000),				42.31	29.99	1156.57	1156.57	2	MS2:40__Salt.4773.4773.2.dta
		DLILSDYAKK	2	shared(2)	1	0.8614
							(0000000000),				35.17	27.87	1164.64	1164.64	2	MS2:40__Salt.4835.4835.2.dta
		FPPVIFYTPK	40	shared(2)	0	0.9777
							(0000000000),				54.41	27.98	1207.66	1207.66	2	MS2:20__Salt.7774.7774.2.dta
		EHCPPSYPVK	2	shared(2)	0	0.8688
							(0000000000),				34.9	31	1212.56	1212.56	2	MS2:60__Salt.2629.2629.2.dta
		VIHTSVWAGQK	3	shared(2)	0	0.8472
							(00000000000),				32.12	28.25	1224.66	1224.66	2	MS2:90__Salt_one_Recal.2669.2669.2.dta
		VESHFDLELR	1	shared(2)	0	0.7519
							(0000000000),				27.33	29.69	1243.62	1243.62	2	MS2:50__Salt.5135.5135.2.dta
		IIRDHGDMSSK	3	distinct	1	0.9005
							(00000000000),				37.53	30.5	1257.61	1257.61	2	MS2:100__Salt.2088.2088.2.dta
		LAGQLLSDLIDR	13	shared(2)	0	0.9974
							(000000000000),				78.07	27.75	1312.73	1312.73	2	MS2:100_acn_grad.5530.5530.2.dta
		TILQHLSEAWR	27	shared(2)	0	0.9997
							(00000000000),				38.37	27.96	1352.73	1352.72	3	MS2:80__Salt_Recal.6842.6842.3.dta
							(00000000000),				61.93	28.88	1352.71	1352.72	2	MS2:90__Salt_one_Recal.6764.6765.2.dta
							(00000000000),				28.1	28.45	1352.72	1352.72	1	MS2:90__Salt_one.7788.7788.1.dta
		WGDYDSHDIER	6	shared(2)	0	0.9985
							(00000000000),				53.5	29.5	1391.57	1391.57	2	MS2:50__Salt.3838.3838.2.dta
							(00000000000),				42.72	29.73	1391.58	1391.57	1	MS2:40__Salt.3557.3557.1.dta
		FSPIPFPPLSYK	2	shared(2)	0	0.9132
							(000000000000),				38.23	28.57	1391.75	1391.75	2	MS2:10__Salt.9757.9757.2.dta
		DMSHTNSYGLIR	3	shared(2)	0	0.9862
							(000000000000),				59.57	30.25	1392.65	1392.65	2	MS2:50__Salt.4116.4116.2.dta
		FTLWWSPTINR	3	shared(2)	0	0.8646
							(00000000000),				33.83	29.7	1419.73	1419.73	2	MS2:20__Salt.9429.9429.2.dta
		VNHIYVNSEDIK	4	shared(2)	0	0.9931
							(000000000000),				39.32	30.54	1429.72	1429.72	3	MS2:60__Salt.3586.3586.3.dta
							(000000000000),				41.61	31.1	1429.72	1429.72	2	MS2:90__Salt_one.3439.3439.2.dta
		WPMSKPSLVAESK	11	distinct	0	0.9922
							(0000000000000),				52	30.31	1458.75	1458.75	2	MS2:90__Salt_two_Recal.4076.4076.2.dta
							(0000000000000),				26.28	29.59	1458.76	1458.75	3	MS2:90__Salt_two_Recal.4080.4080.3.dta
		QGYNMLNLLIHR	5	shared(2)	0	0.9811
							(000000000000),				38.25	28.73	1470.78	1470.78	3	MS2:100__Salt.9279.9279.3.dta
							(000000000000),				30.16	28.66	1470.78	1470.78	2	MS2:100__Salt.9296.9296.2.dta
		ILENNKQWDGEK	4	shared(2)	1	0.9755
							(000000000000),				53.12	30.45	1472.72	1472.73	2	MS2:90__Salt_one.3032.3032.2.dta
		GSELQLPFQACLK	1	shared(2)	0	0.8216
							(0000000000000),				30.01	30.27	1489.76	1489.76	2	MS2:10__Salt.6764.6764.2.dta
		LTLEDLEDSWDR	7	shared(2)	0	0.9999
							(000000000000),				68.47	31.17	1490.69	1490.69	2	MS2:100_acn_grad.5193.5193.2.dta
							(000000000000),				56.19	31.13	1490.69	1490.69	1	MS2:100_acn_grad_Recal.6065.6065.1.dta
		QAHEANQVTAVTTK	20	shared(2)	0	0.9993
							(00000000000000),				71.59	29.81	1496.76	1496.76	2	MS2:60__Salt.2520.2520.2.dta
							(00000000000000),				32.83	29.82	1496.76	1496.76	3	MS2:70__Salt.2283.2283.3.dta
		ADWWTNVAHYNR	13	shared(2)	0	0.9992
							(000000000000),				74.01	31.49	1531.7	1531.7	2	MS2:80__Salt.6910.6910.2.dta
							(000000000000),				31.29	31.6	1531.7	1531.7	3	MS2:60__Salt_Recal.5967.5967.3.dta
		YSQQTDVGVTHFR	68	shared(2)	0	1
							(0000000000000),				88.71	30.74	1536.73	1536.73	2	MS2:90__Salt_one.3357.3357.2.dta
							(0000000000000),				64.53	30.7	1537.73	1536.73	3	MS2:90__Salt_two.3335.3335.3.dta
		NNVNTSALTQSEIR	1	shared(2)	0	0.9997
							(00000000000000),				102.43	29.95	1545.78	1545.78	2	MS2:100_acn_grad.2498.2498.2.dta
		VPGLPVPIENMILR	19	shared(2)	0	0.9952
							(00000000000000),				47.51	22.55	1546.89	1546.89	2	MS2:20__Salt.10392.10392.2.dta
							(00000000000000),				31.96	21.88	1547.89	1546.89	3	MS2:50__Salt.10667.10667.3.dta
		LVLDHNIADYVTAK	41	shared(2)	0	0.9998
							(00000000000000),				44.55	27.92	1570.84	1570.84	3	MS2:50__Salt.7317.7317.3.dta
							(00000000000000),				72.28	28.63	1570.84	1570.84	2	MS2:50__Salt.7305.7305.2.dta
		WNTALIGLMTYFR	11	shared(2)	0	0.9981
							(0000000000000),				81.88	29.53	1585.82	1584.81	2	MS2:10__Salt.13163.13163.2.dta
		GDEDWNEFNDINK	2	shared(2)	0	0.9892
							(0000000000000),				61.91	29.94	1594.65	1594.65	2	MS2:100_acn_grad.2415.2415.2.dta
		RAEDIPLVSEWYK	22	shared(2)	1	0.9996
							(0000000000000),				71.22	30.41	1604.81	1604.82	2	MS2:60__Salt_Recal.7539.7539.2.dta
							(0000000000000),				41.52	30.03	1604.82	1604.82	3	MS2:60__Salt.8406.8406.3.dta
		LLENMPMPWEQVR	1	distinct	0	0.8733
							(0000000000000),				34.03	30.76	1641.8	1641.8	2	MS2:10__Salt.9188.9188.2.dta
		RLTLEDLEDSWDR	31	shared(2)	1	0.9993
							(0000000000000),				66.91	30.88	1646.79	1646.79	2	MS2:50__Salt.8845.8845.2.dta
							(0000000000000),				39.97	30.9	1646.79	1646.79	3	MS2:50__Salt_Recal.7910.7910.3.dta
		KNNVNTSALTQSEIR	20	shared(2)	1	1
							(000000000000000),				92.59	29	1673.87	1673.87	2	MS2:80__Salt.3351.3351.2.dta
							(000000000000000),				61	29.01	1673.87	1673.87	3	MS2:90__Salt_one.3338.3338.3.dta
		AAVMHDVLDAMPEGIK	31	shared(2)	0	0.9998
							(0000000000000000),				82.1	30.96	1695.83	1695.83	2	MS2:50__Salt.7655.7655.2.dta
							(0000000000000000),				33.94	31.06	1695.83	1695.83	3	MS2:40__Salt_Recal.6702.6702.3.dta
		MNSSCADILLFAAHR	5	shared(2)	0	0.9998
							(000000000000000),				44.97	31.27	1704.81	1704.81	3	MS2:70__Salt.7954.7954.3.dta
							(000000000000000),				75.24	31.13	1704.81	1704.81	2	MS2:80__Salt.7948.7948.2.dta
		EATVHTQELLDLLVK	9	shared(2)	0	0.9987
							(000000000000000),				25.66	25.8	1707.94	1707.94	3	MS2:50__Salt.9821.9821.3.dta
							(000000000000000),				69.72	25.97	1707.94	1707.94	2	MS2:100_acn_grad.5626.5626.2.dta
		DGVWNLQNEQTKER	2	shared(2)	1	0.9963
							(00000000000000),				73.91	30.97	1715.82	1715.82	2	MS2:50__Salt.4366.4366.2.dta
		GTYFPTWEGLFWEK	11	shared(2)	0	0.9937
							(00000000000000),				67.87	31	1759.83	1759.83	2	MS2:10__Salt.10207.10207.2.dta
		YIQPWESEFIDSQR	15	shared(2)	0	0.9995
							(00000000000000),				57.28	31.43	1797.84	1796.84	2	MS2:10__Salt.7805.7805.2.dta
							(00000000000000),				51.28	31.68	1796.83	1796.84	3	MS2:10__Salt.7829.7829.3.dta
		DNPNLLFSMCGFEVR	4	shared(2)	0	0.9729
							(000000000000000),				50.88	31.14	1797.82	1797.82	2	MS2:100_acn_grad.6309.6309.2.dta
		DTGSNPHGYLPTHYEK	21	shared(2)	0	0.9998
							(0000000000000000),				45.72	31.35	1814.82	1814.82	3	MS2:80__Salt.3364.3364.3.dta
							(0000000000000000),				75.28	31.48	1814.81	1814.82	2	MS2:80__Salt_Recal.2697.2697.2.dta
		SGMSHEEDQLIPNLYR	23	shared(2)	0	0.9989
							(0000000000000000),				87.25	31.61	1887.88	1887.88	2	MS2:90__Salt_one.6870.6870.2.dta
		LTLEDLEDSWDRGIPR	2	shared(2)	1	0.9877
							(0000000000000000),				61.71	30.42	1913.95	1913.95	3	MS2:50__Salt.10917.10917.3.dta
		NYFYLFDMESFFTAK	9	shared(2)	0	0.9964
							(000000000000000),				74.04	31.35	1922.87	1921.86	2	MS2:20__Salt.13455.13455.2.dta
		SITTLEWENSFVSVYSK	5	shared(2)	0	0.9933
							(00000000000000000),				65.95	31.11	1988.97	1988.97	2	MS2:10__Salt.9991.9991.2.dta
		FGFVETQKEDMPPEHVR	12	shared(2)	1	0.9877
							(00000000000000000),				61.55	31.62	2044.96	2044.97	3	MS2:100__Salt_Recal.4933.4933.3.dta
		AAVMHDVLDAMPEGIKQNK	1	shared(2)	1	0.9237
							(0000000000000000000),				39.67	30.43	2066.03	2066.03	3	MS2:90__Salt_one.6729.6729.3.dta
		ATEPQMVLFNIYDDWLK	6	shared(2)	0	0.9961
							(00000000000000000),				72.03	30.67	2083.02	2082.01	2	MS2:100_acn_grad.8183.8183.2.dta
		TQISGYMYGISPPDNPQVK	2	distinct	0	0.8838
							(0000000000000000000),				32.64	31	2094.01	2094.01	2	MS2:10__Salt.4942.4942.2.dta
		DMEKGDEDWNEFNDINK	9	shared(2)	1	0.9974
							(00000000000000000),				76.63	30.91	2097.86	2097.86	2	MS2:100_acn_grad.3481.3481.2.dta
		TDVIQALGGVEGILEHTLFK	34	shared(2)	0	0.9994
							(00000000000000000000),				53.83	25.47	2139.16	2139.16	3	MS2:90__Salt_one.15894.15894.3.dta
							(00000000000000000000),				46.2	25.63	2140.16	2139.16	2	MS2:90__Salt_one.16113.16113.2.dta
		ITDAYLDQYLWYEGDKR	25	shared(2)	1	1
							(00000000000000000),				92.47	31.25	2148.02	2148.02	2	MS2:100_acn_grad.5016.5016.2.dta
							(00000000000000000),				55.81	31.04	2149.01	2148.02	3	MS2:40__Salt_Recal.8323.8323.3.dta
		GMLDPLEVHLLDFPNIVIK	5	shared(2)	0	0.9042
							(0000000000000000000),				19.88	24.12	2163.19	2162.18	3	MS2:90__Salt_one.13579.13579.3.dta
							(0000000000000000000),				22.05	23.4	2162.19	2162.18	2	MS2:90__Salt_two.13380.13380.2.dta
		CIILTCSFTPGSCSLTAYK	2	shared(2)	0	0.9944
							(0000000000000000000),				67.35	31.17	2178.02	2178.02	2	MS2:100_acn_grad.4885.4885.2.dta
		EELGLIEQAYDNPHEALSR	29	shared(2)	0	1
							(0000000000000000000),				96.49	30.84	2183.05	2183.05	2	MS2:100_acn_grad.4217.4217.2.dta
							(0000000000000000000),				88.26	30.72	2183.05	2183.05	3	MS2:90__Salt_one.7386.7386.3.dta
		FFQTTELDWVEAGLQVCR	1	shared(2)	0	0.8504
							(000000000000000000),				32.56	31.13	2198.05	2198.05	3	MS2:10__Salt.11468.11468.3.dta
		EIGGLGMLSMGHILIPQSDLR	8	shared(2)	0	0.9973
							(000000000000000000000),				44.77	26.79	2236.17	2236.17	3	MS2:100__Salt.11050.11050.3.dta
							(000000000000000000000),				38.22	28.83	2237.16	2236.17	2	MS2:90__Salt_two_Recal.10252.10252.2.dta
		YLTEHPDPNNENMVGYNNK	5	shared(2)	0	0.9998
							(0000000000000000000),				46.22	31.43	2247.98	2247.99	3	MS2:40__Salt.3759.3759.3.dta
							(0000000000000000000),				75.66	31.55	2247.99	2247.99	2	MS2:50__Salt.3891.3891.2.dta
		YLTEHPDPNNENMVGYNNKK	9	shared(2)	1	0.9999
							(00000000000000000000),				64.45	31.4	2376.06	2376.08	3	MS2:80__Salt_Recal.2927.2927.3.dta
							(00000000000000000000),				58.57	30.92	2376.09	2376.08	2	MS2:90__Salt_one.3594.3594.2.dta
		VYEDDDDDDWILPDGVEPLLK	10	distinct	0	0.9999
							(000000000000000000000),				90.92	31.6	2460.13	2460.12	2	MS2:100_acn_grad.6722.6722.2.dta
							(000000000000000000000),				29.14	31.51	2460.13	2460.12	3	MS2:100_acn_grad.6730.6730.3.dta
		FLGFYMVPDNGPWNYNFMGVR	15	shared(2)	0	0.9958
							(000000000000000000000),				69.81	32	2523.16	2523.15	2	MS2:100_acn_grad.9111.9111.2.dta
		AEDPDLPAFYYDPLIHPITSANK	55	shared(2)	0	1
							(00000000000000000000000),				76.53	30.25	2586.26	2586.26	3	MS2:90__Salt_two.10486.10486.3.dta
							(00000000000000000000000),				54.04	30.07	2586.27	2586.26	2	MS2:100__Salt.10306.10306.2.dta
		VNHIYVNSEDIKETGYTYIMPK	1	shared(2)	1	0.8634
							(0000000000000000000000),				31.82	30.48	2613.28	2613.28	3	MS2:90__Salt_one.7282.7282.3.dta
		RVYEDDDDDDWILPDGVEPLLK	3	distinct	1	0.9997
							(0000000000000000000000),				77.52	30.75	2616.22	2616.22	2	MS2:40__Salt.10769.10769.2.dta
							(0000000000000000000000),				31.65	30.72	2616.23	2616.22	3	MS2:40__Salt.10952.10952.3.dta
		TTNVHGEELIVTTTSPYEQAAFGSK	18	shared(2)	0	0.9994
							(0000000000000000000000000),				62.21	30.22	2679.3	2679.3	3	MS2:80__Salt.7518.7518.3.dta
							(0000000000000000000000000),				36.56	30.23	2679.3	2679.3	2	MS2:80__Salt.7376.7376.2.dta
		DGPYVTPEEAVAIYTTTVHWLESR	6	shared(2)	0	0.8426
							(000000000000000000000000),				29.44	30.68	2734.31	2733.33	3	MS2:90__Salt_one_Recal.14835.14835.3.dta
		DTQLYTDTTAAGISLLFAPRPFNMR	7	shared(2)	0	0.9952
							(0000000000000000000000000),				68.51	29	2799.41	2798.41	3	MS2:80__Salt.12202.12202.3.dta
		AEDPDLPAFYYDPLIHPITSANKER	2	shared(2)	1	0.9799
							(0000000000000000000000000),				52.35	29.93	2871.41	2871.41	3	MS2:90__Salt_one.9771.9771.3.dta
		EVGIEFMDLYSYLIPVYEIEPLEK	10	shared(2)	0	0.9836
							(000000000000000000000000),				52.28	28.02	2888.46	2888.45	2	MS2:10__Salt.16323.16323.2.dta
		LGNVDAFQLADGLQYTFSHVGQLTGMYR	1	shared(2)	0	0.8842
							(0000000000000000000000000000),				31.19	30.09	3101.51	3100.51	3	MS2:100__Salt.14671.14671.3.dta
																	Glyma13g44290.1	276963	PRE-MRNA SPLICING FACTOR PRP8
40	1
		LILNIKPK	4	shared(2)	0	0.7827
							(00000000),				24.85	9.03	937.633	937.632	2	MS2:90__Salt_one.4321.4321.2.dta
		YEVTAAHGR	3	shared(2)	0	0.8858
							(000000000),				36.45	29.13	1002.49	1002.49	2	MS2:90__Salt_one.2134.2134.2.dta
		LVGADPDDKR	1	shared(2)	1	0.9418
							(0000000000),				43.66	28.81	1084.55	1084.55	2	MS2:40__Salt.1861.1861.2.dta
		AGMDELVILK	1	shared(2)	0	0.6291
							(0000000000),				29.88	29.53	1087.59	1087.6	2	MS2:50__Salt.4528.4528.2.dta
		VFVLDPDKR	6	shared(2)	1	0.9566
							(000000000),				47.46	29.05	1087.6	1087.6	2	MS2:50__Salt.4113.4113.2.dta
		RFDYDHDEER	3	distinct	1	0.9723
							(0000000000),				52.33	29.66	1380.57	1380.57	2	MS2:80__Salt.2610.2610.2.dta
		DIGTLITGSPGEDPK	4	shared(2)	0	0.9905
[truncated: 73,617 more rows]
